23           **Abstract**

24           The response to insufficient oxygen (hypoxia) is orchestrated by the conserved Hypoxia-  
25 Inducible Factor (HIF). However, HIF-independent hypoxia response pathways exist that act in parallel  
26 to HIF to mediate the physiological hypoxia response. Here, we describe a HIF-independent hypoxia  
27 response pathway controlled by *Caenorhabditis elegans* Nuclear Hormone Receptor NHR-49, an  
28 orthologue of mammalian Peroxisome Proliferator-Activated Receptor alpha (PPAR $\alpha$ ). We show that  
29 *nhr-49* is required for worm survival in hypoxia and is synthetic lethal with *hif-1* in this context,  
30 demonstrating that these factors act independently. RNA-seq analysis shows that in hypoxia *nhr-49*  
31 regulates a set of genes that are *hif-1*-independent, including autophagy genes that promote hypoxia  
32 survival. We further show that Nuclear Hormone Receptor *nhr-67* is a negative regulator and  
33 Homeodomain-interacting Protein Kinase *hpk-1* is a positive regulator of the NHR-49 pathway.  
34 Together, our experiments define a new, essential hypoxia response pathway that acts in parallel to the  
35 well-known HIF-mediated hypoxia response.

36

37 **Introduction**

38 Organisms are continuously exposed to endogenous and exogenous stresses, from suboptimal  
39 temperatures to foreign substances. Thus, an organism's ability to mount specific stress responses,  
40 including protecting healthy cells from harm or inducing apoptosis when damage to a cell cannot be  
41 overcome, is critical for survival. Hypoxia is a stress that occurs when cellular oxygen levels are too  
42 low for normal physiological functions. It occurs naturally in cells and tissues during development, as  
43 well as in many diseases (P. Lee et al., 2020; Powell-Coffman, 2010). For example, due to  
44 hyperproliferation, inadequate vascularization, and loss of matrix attachment, cancer cells grow in  
45 hostile microenvironments featuring hypoxia. Certain cancers thus hijack the hypoxia response to allow  
46 growth and metastasis in these harsh conditions (Rankin & Giaccia, 2016; Schito & Semenza, 2016; T.  
47 Zhang et al., 2019), and tumor hypoxia correlates with poor clinical outcome (Keith & Simon, 2007).  
48 Most prominently, mutations in the tumor suppressor von Hippel Lindau (VHL), which inhibits the  
49 transcription factor hypoxia-inducible factor (HIF), occur in kidney cancers, and the resulting  
50 accumulation of HIF drives tumor growth (Kaelin, 2008; M. Li & Kim, 2011). In line with a pivotal  
51 role of HIF in these cancers are studies showing promising effects of HIF inhibitors in preclinical  
52 (Albadari et al., 2019; W. Chen et al., 2016; Cho et al., 2016) and clinical studies (Fallah & Rini,  
53 2019). However, a better understanding of the transcriptional hypoxia adaptation pathway is needed to  
54 pinpoint new drug targets and to gain a deeper insight into how cells, tissues, and organisms cope with  
55 hypoxia.

56 The pathways that regulate the response to hypoxia are evolutionarily conserved from the  
57 nematode worm *Caenorhabditis elegans* to humans. As in mammals, a key pathway in *C. elegans*  
58 involves the transcription factor HIF-1, which is critical for the cellular responses to, and the defense  
59 against hypoxia (Choudhry & Harris, 2018; Jiang et al., 2001). To survive hypoxia, animals activate the  
60 EGL-Nine homolog (EGLN)–VHL-HIF pathway (*egl-9–vhl-1–hif-1* in *C. elegans*). In normoxic  
61 conditions (21% O<sub>2</sub>), HIF-1 is degraded and thus inactive. This occurs when EGL-9 adds a hydroxyl

62 group onto a proline residue within HIF-1. The hydroxylated proline promotes binding of the E3  
63 ubiquitin ligase VHL-1, leading to poly-ubiquitination and proteasomal degradation of HIF-1.  
64 However, in hypoxic conditions, EGL-9 is rendered inactive; hence, HIF-1 is stabilized and activates a  
65 hypoxia adaptation gene expression program (Epstein et al., 2001; Powell-Coffman, 2010).

66 Although the responses controlled by the HIF-1 master regulator are most studied, evidence for  
67 parallel transcriptional programs in hypoxia exists, from *C. elegans* to mammalian organisms. For  
68 example, the transcription factor B lymphocyte-induced maturation protein 1 (BLMP-1) has a *hif-1*-  
69 independent hypoxia regulatory role in *C. elegans* (Padmanabha et al., 2015), as does the conserved  
70 nuclear hormone receptor (NHR) estrogen-related receptor (dERR) in *Drosophila melanogaster* (Y. Li  
71 et al., 2013), and the cargo receptor Sequestosome 1 (SQSTM1/p62) in mammals (Pursiheimo et al.,  
72 2009). Thus, despite the evolutionarily conserved and important role of the HIF family, robust and  
73 effective hypoxia adaptation requires an intricate network of factors that act in concert. Compared to  
74 HIF, there is far less known about the mechanisms by which these pathways contribute to the hypoxia  
75 response.

76 *C. elegans* NHR-49 is a transcription factor orthologous to mammalian hepatocyte nuclear  
77 factor 4 (HNF4) and peroxisome proliferator-activated receptor  $\alpha$  (PPAR $\alpha$ ) (K. Lee et al., 2016).  
78 Similar to these NHRs, it controls lipid metabolism by activating genes involved in fatty acid  
79 desaturation and mitochondrial  $\beta$ -oxidation (Pathare et al., 2012; Marc R. Van Gilst et al., 2005). By  
80 maintaining lipid homeostasis, NHR-49 is able to extend lifespan, a phenotype often associated with  
81 stress resistance (Burkewitz et al., 2015; Ratnappan et al., 2014). In addition to regulating lipid  
82 metabolism, NHR-49 also regulates putative xenobiotic detoxification genes in a dietary restriction-like  
83 state and during starvation (Chamoli et al., 2014; Goh et al., 2018), is required for resistance to  
84 oxidative stress (Goh et al., 2018), and activates innate immune response programs upon infection of *C.*  
85 *elegans* with *Staphylococcus aureus* (Wani et al., 2020), *Pseudomonas aeruginosa* (Naim et al., 2020),  
86 and *Enterococcus faecalis* (Dasgupta et al., 2020). Moreover, a recent report showed that *nhr-49* is

87 required to increase expression of the Catechol-O-Methyl-Transferase *comt-5* downstream of the  
88 Hypoxia Inhibited Receptor tyrosine kinase *hir-1*, which mediates extracellular matrix remodelling in  
89 hypoxia (Vozdek et al., 2018). However, the role of *nhr-49* in hypoxia and how it intersects with *hif-1*  
90 have not been explored.

91 The detoxification gene flavin mono-oxygenase 2 (*fmo-2*) is induced in many of the  
92 aforementioned stresses in an *nhr-49*-dependent manner (Dasgupta et al., 2020; Goh et al., 2018; Wani  
93 et al., 2020). Interestingly, *fmo-2* is also a *hif-1*-dependent hypoxia response gene (Leiser et al., 2015;  
94 Shen et al., 2005), but its dependence on *nhr-49* in hypoxia is not known. We hypothesized that *nhr-49*  
95 may play a role in the worm hypoxia response, in part by regulating *fmo-2* expression. Here, we show  
96 that *nhr-49* is not only required to induce *fmo-2*, but controls a broad transcriptional response to  
97 hypoxia, including the induction of autophagy genes that are also required for survival in hypoxia. Our  
98 epistasis experiments indicate that *nhr-49* is functionally required independently of *hif-1* in hypoxia.  
99 Finally, we identify the protein kinase homeodomain interacting protein kinase 1 (*hpk-1*) as an  
100 upstream activator and the transcription factor *nhr-67* as a repressor of the *nhr-49* hypoxia response  
101 pathway. Together, our data define NHR-49 as a core player in a novel hypoxia response pathway that  
102 acts independently of *hif-1*.

103

104 **Results**

105 ***nhr-49* is required to induce the expression of *fmo-2* in hypoxia**

106 *C. elegans fmo-2* is induced by oxidative stress, starvation, and pathogen infection in an *nhr-49*-  
107 dependent fashion (Dasgupta et al., 2020; Goh et al., 2018; Wani et al., 2020). *fmo-2* expression is also  
108 induced in a *hif-1*-dependent manner during hypoxia (0.1% O<sub>2</sub>; Leiser et al., 2015; Shen et al., 2005).  
109 To test whether *nhr-49* regulates *fmo-2* expression in hypoxia, we quantified *fmo-2* mRNA levels in  
110 normoxia (21% O<sub>2</sub>) and hypoxia (0.5% O<sub>2</sub>) by quantitative Reverse Transcription PCR (qRT-PCR) in  
111 wild-type and mutant worms. The *nr2041* allele deletes portions of both the DNA binding domain and  
112 the ligand binding domain of *nhr-49* and is a predicted molecular null allele (Liu et al., 1999), and the  
113 *ia4* allele deletes exons 2-4 of *hif-1* and is also a predicted null allele (Jiang et al., 2001). In wild-type  
114 worms, *fmo-2* transcript levels increased approximately 40-fold in hypoxia, but this induction was  
115 blocked in both *nhr-49(nr2041)* and *hif-1(ia4)* mutant worms (Figure 1A). Experiments using a  
116 transgenic strain expressing a transcriptional *Pfmo-2::gfp* reporter (Goh et al., 2018) corroborated these  
117 observations *in vivo*. In normoxia, this reporter is weakly expressed in some neurons and in the  
118 intestine of transgenic animals, but expression was significantly elevated in the intestine of transgenic  
119 worms in hypoxia (Figure 1B-C). High pharyngeal expression made it difficult to quantify neuronal  
120 *Pfmo-2::gfp* in hypoxia. Consistent with our qRT-PCR data, loss of *nhr-49* abrogated the increase in  
121 intestinal upregulation of *Pfmo-2::gfp* worms following hypoxia exposure. We conclude that *nhr-49* is  
122 required to induce *fmo-2* in hypoxia.

123

124 ***nhr-49* is required throughout the *C. elegans* life cycle to promote hypoxia resistance**  
125 **independently of *hif-1***

126 Wild-type embryos can survive a 24 h exposure to environments with as little as 0.5% O<sub>2</sub>,  
127 dependent on the presence of *hif-1* (Jiang et al., 2001; Nystul & Roth, 2004). We wanted to determine  
128 if *nhr-49*, like *hif-1*, is functionally required for worm survival during hypoxia. We first assessed the

129 ability of worm embryos to survive for 24 hours in 0.5% O<sub>2</sub> and then recover to the L4 or later stage  
130 when placed back in normoxia for 65 hours. We found that 86% of wild-type worm embryos reached at  
131 least the L4 stage, while only 25% of *nhr-49* and *hif-1* null mutant worms reached at least the L4 stage  
132 by that time (Figure 2A). This shows that, like *hif-1*, *nhr-49* is required for embryo survival in hypoxia.

133 Next, we asked whether *nhr-49* acts in the *hif-1* hypoxia response pathway or in a separate,  
134 parallel response pathway. To address this question, we generated a *nhr-49(nr2041);hif-1(ia4)* double  
135 null mutant. We observed that less than 2% of *nhr-49;hif-1* double null mutants reached at least the L4  
136 stage following hypoxia exposure (Figure 2A). This suggests that *nhr-49* and *hif-1* act in separate,  
137 genetically independent hypoxia response pathways.

138 To determine if *nhr-49* and *hif-1* are required for larval development in hypoxia, we exposed  
139 newly hatched, first stage (L1) larvae to hypoxia for 48 hours. Following this treatment, 95% of wild-  
140 type worms reached at least the L4 stage (Figure 2B). In contrast, only 19% of *nhr-49* and only 20% of  
141 *hif-1* mutant worms, respectively, reached at least the L4 stage, and no *nhr-49;hif-1* double null mutant  
142 worms survived and developed to L4 (Figure 2B). Together, these results show that *nhr-49* is required  
143 for worm adaptation to hypoxia independently of *hif-1* both during embryogenesis and post-  
144 embryonically.

145 In normal conditions, *nhr-49* null worms have a shortened lifespan (Marc R. Van Gilst et al.,  
146 2005). This raised the concern that the defects observed in hypoxia may be an indirect consequence of  
147 NHR-49's normal developmental roles. To test whether the effects observed above were due to a  
148 specific requirement for *nhr-49* in the hypoxia response, we studied worm development in normoxia.  
149 We found that loss of *nhr-49* had no effect on worm survival from embryo to at least the L4 stage at  
150 21% O<sub>2</sub> (Supplementary Figure 1A, Supplementary Table 1). Additionally, at 21% O<sub>2</sub>, *nhr-49* null  
151 mutants did not significantly develop slower than wildtype worms (Supplementary Figure 1B,  
152 Supplementary Table 2). Together, these data show that although *nhr-49* null mutants display mild

153 developmental defects in normoxia, the phenotypes observed are due to the requirement for *nhr-49*  
154 specifically during hypoxia.

155

### 156 ***nhr-49* is dispensable for survival in hydrogen sulfide**

157 To assess whether *nhr-49* is involved other responses requiring *hif-1*, we next asked if it was  
158 required for adaptation to hydrogen sulfide (H<sub>2</sub>S). H<sub>2</sub>S is produced endogenously and is an important  
159 signalling molecule in animals, including in *C. elegans* (L. Li et al., 2011). However, exposure to high  
160 levels of hydrogen sulfide can be lethal. As in the hypoxia response, *hif-1* is a master regulator of the  
161 transcriptional response to exogenous hydrogen sulfide, and *hif-1* is required for worm survival to  
162 50ppm H<sub>2</sub>S. In (Budde & Roth, 2010; Miller et al., 2011)contrast, we found that *nhr-49* null mutants  
163 survive exposure to 50ppm H<sub>2</sub>S as well as wild-type controls (Figure 2C). This suggests that the  
164 requirement for *nhr-49* is stress specific, and that *nhr-49* does not participate in all *hif-1*-dependent  
165 stress responses. This is consistent with previous observations that the *hif-1*-dependent changes in gene  
166 expression in H<sub>2</sub>S are quite different than those seen in hypoxia (Miller et al., 2011). Additionally, the  
167 ability of *nhr-49* mutants to readily adapt to H<sub>2</sub>S provides further evidence that the mild developmental  
168 defects of *nhr-49* null mutants do not render the animal sensitive to all stresses. Instead, our data  
169 indicate that *nhr-49*'s requirement for hypoxia survival is due to a specific function for this regulator in  
170 this particular stress condition.

171

### 172 **The *nhr-49*-dependent transcriptional response to hypoxia includes *hif-1*-independent genes**

173 To delineate the genes and biological processes regulated by NHR-49 in hypoxia, we analyzed  
174 whole-animal transcriptomes of wild-type, *nhr-49*, and *hif-1* worms before and after exposure to  
175 hypoxia using RNA-sequencing (RNA-seq; Figure 3A, B, Supplementary Figure 2A). We found that  
176 hypoxia significantly upregulated 718 genes and downregulated 339 genes more than two-fold in wild-  
177 type worms, including the known hypoxia-inducible genes *egl-9*, *phy-2*, *nhr-57*, and F22B5.4 (Bishop



178 et al., 2004; Shen et al., 2005), validating our approach. 315 of the upregulated and 177 of the  
179 downregulated genes were dependent on *nhr-49*. Of these *nhr-49* regulated genes, 83 of the  
180 upregulated and 51 of the downregulated genes were *hif-1*-independent (Figure 3A, B). In line with our  
181 above data, *fmo-2* was induced in an *nhr-49*-dependent manner (Figure 3C). However, although our  
182 qRT-PCR data (Figure 1A) show that *fmo-2* induction is dependent on *hif-1*, our RNA-seq analysis  
183 excluded *fmo-2* from the *hif-1*-dependent set because it retained more than two-fold induction in  
184 hypoxia vs. normoxia (Supplementary Figure 2B). This suggests that although *fmo-2* induction is  
185 somewhat dependent on *hif-1*, it requires *nhr-49*. Thus, although many hypoxia responsive genes are  
186 controlled by both transcription factors, a subset is *nhr-49*-dependent but *hif-1*-independent.

187 We next performed functional enrichment analysis to identify the biological pathways and  
188 processes regulated in hypoxia, and specifically those dependent on *nhr-49*. In wild-type worms,  
189 pathways such as detoxification, response to heavy metal stress, and autophagy were induced  
190 (Supplementary Figure 2C), whereas processes such as amino acid transport and metabolism were  
191 downregulated (Supplementary Figure 2D). In the set of 83 genes that exclusively require *nhr-49* but  
192 not *hif-1* for induction in hypoxia (Figure 3C, Supplementary Table 3), autophagy and detoxification  
193 were significantly enriched (Figure 3D), suggesting a requirement for *nhr-49* to regulate these  
194 particular processes in hypoxia. Interestingly, a separate set of detoxification genes was dependent only  
195 on *hif-1* (Supplementary Figure 2E, F, Supplementary Table 4), and a third set of detoxification genes  
196 were independent of both *nhr-49* and *hif-1* (Supplementary Figure 2G, H, Supplementary Table 5).  
197 This suggests that there may be an additional transcription factor(s) regulating this process in hypoxia.

198 Our RNA-seq data revealed that the acyl-CoA synthetase gene *acs-2* is induced in response to  
199 hypoxia in an *nhr-49*-dependent manner (Figure 3C, Supplementary Table 3). ACS-2 acts in the first  
200 step of mitochondrial fatty acid  $\beta$ -oxidation, and is strongly induced by NHR-49 during starvation and  
201 following exposure to *E. faecalis* (Dasgupta et al., 2020; Marc R. Van Gilst et al., 2005). To validate  
202 our RNA-seq data, we quantified *acs-2* expression via qRT-PCR. Following hypoxia exposure, *acs-2*

203 transcript levels increased approximately seven-fold, and this induction was blocked in the *nhr-49* null  
204 mutant, but not the *hif-1* null mutant (Supplementary Figure 3A). We used a transgenic strain  
205 expressing a transcriptional *Pacs-2::gfp* reporter to study this regulation *in vivo* (Burkewitz et al.,  
206 2015). This reporter showed moderate GFP expression in the body of animals under normoxia, but  
207 expression increased substantially in the intestine following exposure to hypoxia (Supplementary  
208 Figure 3B, C). Consistent with our RNA-seq and qRT-PCR data, loss of *nhr-49* blocked transcriptional  
209 activation via the *acs-2* promoter, as GFP was weaker in the intestines of these worms following  
210 hypoxia exposure (Supplementary Figure 3B, C). Collectively, these data show that *nhr-49* is  
211 specifically required and that *hif-1* is dispensable for induction of *acs-2* in hypoxia.

#### 212 213 **Autophagy genes are critical downstream targets of *nhr-49* in hypoxia**

214 Next, we wanted to determine which of *nhr-49*'s downstream transcriptional targets are  
215 functionally important for worm survival in hypoxia. We first assessed the ability of *fmo-2(ok2147)*  
216 and *acs-2(ok2457)* embryos to survive hypoxia, as both genes are strongly induced during hypoxia in  
217 an *nhr-49*-dependent manner. Individually, loss of either *fmo-2* (60%) or *acs-2* (65%) did not  
218 significantly decrease embryo viability compared to wild-type (79%) (Figure 3E). However,  
219 simultaneous loss of both *fmo-2* and *acs-2* resulted in a significant decrease in survival after hypoxia  
220 (47%). None of the mutant animals showed embryo viability defects in normoxia, indicating that the  
221 phenotypes observed were specifically due to the requirement of these genes in hypoxia survival  
222 (Supplementary Figure 4A, Supplementary Table 1). These data suggest that *fmo-2* and *acs-2* each  
223 contribute only modestly to worm survival to hypoxia, and are likely not the main factors contributing  
224 to *nhr-49*'s importance in survival to this stress. This resembles previous observations that mutations  
225 that disrupt individual *hif-1*-responsive genes show only minor defects in hypoxia survival (Shen et al.,  
226 2005).

227 Our RNA-seq analysis revealed autophagy as a major biological process modulated by *nhr-49*.  
228 Notably, *C. elegans* show sensitivity to anoxia when the autophagy pathway is disrupted (Samokhvalov  
229 et al., 2008), and autophagy is upregulated in anoxia (Chapin et al., 2015). However, the responses to  
230 anoxia and hypoxia are mediated by different regulatory pathways (Nystul & Roth, 2004), and it thus  
231 was not *a priori* clear whether autophagy is also required for hypoxia resistance. To determine if  
232 upregulation of autophagy by *nhr-49* is required for worm survival in hypoxia, we depleted several  
233 autophagy genes using feeding RNA interference (RNAi) in the wild-type and *nhr-49* null mutant  
234 backgrounds and assessed the ability of these embryos to survive hypoxia. RNAi mediated knockdown  
235 of the autophagy genes *atg-10* (28%), *atg-7* (41%), *bec-1* (27%), and *epg-3* (38%) caused significant  
236 sensitivity to hypoxia in the wild-type background compared to the empty vector (EV) control RNAi  
237 treatment (79%; Figure 3F). Importantly, the sensitivity of worms did not change when these genes  
238 were knocked down in the *nhr-49* null background (32%, 25%, 13%, 13%, respectively), suggesting  
239 that these genes act in the same pathway as *nhr-49*. Depletion of these genes by RNAi alone did not  
240 cause impaired development from embryo to L4 in normoxia, indicating the phenotypes observed were  
241 specifically due to the requirement of these genes in hypoxia survival (Supplementary Figure 4B,  
242 Supplementary Table 1). Together, these data show that autophagy is a functionally important *nhr-49*  
243 regulated process required for worm survival in hypoxia.

244

#### 245 **NHR-49 expression in multiple tissues is sufficient to promote hypoxia survival**

246 To test if *nhr-49* activation is sufficient to promote survival of worms in hypoxia, we studied  
247 the *nhr-49(et13)* gain-of-function strain, which is sufficient to induce *fmo-2* (Goh et al., 2018; K. Lee et  
248 al., 2016). After 24 hours of exposure to hypoxia, approximately 86% of wild-type eggs develop to at  
249 least L4 stage (Figure 2A), but after 48 hours of hypoxia exposure, only approximately 44% of wild-  
250 type eggs develop to at least L4 stage (Figure 4A). In contrast, 75% of *nhr-49(et13)* gain-of-function

251 eggs develop to at least L4 stage after 48 hours of hypoxia exposure, indicating that NHR-49 activation  
252 is sufficient to improve the population survival of worms in hypoxia.

253 NHR-49 is expressed in multiple tissues, including the intestine, neurons, muscle, and  
254 hypodermis (Ratnappan et al., 2014). Neuronal NHR-49 is sufficient to extend life span in some  
255 contexts and regulates genes in distal tissues (Burkewitz et al., 2015), but where the protein acts to  
256 regulate the response to hypoxia is unknown. To study this, we induced expression of an NHR-49::GFP  
257 translational fusion protein in the *nhr-49(nr2041)* mutant background using tissue-specific promoters  
258 (Naim et al., 2020). Comparing the NHR-49::GFP rescue strains to their non-GFP siblings, we found  
259 that expressing *nhr-49* in the intestine, neurons, hypodermis, or from its endogenous promoter was  
260 sufficient to restore population survival to wild-type levels (Figure 4B). This suggests that NHR-49 can  
261 act in multiple somatic tissues to regulate the organismal hypoxia response.

262 To determine if NHR-49 activity alone is sufficient to induce expression of hypoxia response  
263 genes, we assessed the ability of the *nhr-49(et13)* gain-of-function strain to induce some of the *nhr-49*-  
264 dependent hypoxia response genes from our RNA-seq analysis in the absence of stress (Figure 4C). In  
265 line with previous findings (Goh et al., 2018; K. Lee et al., 2016), *nhr-49* was sufficient to induce *fmo*-  
266 *2* and *acs-2* expression on its own. However, other hypoxia inducible *nhr-49* regulated genes involved  
267 in autophagy and detoxification (Supplementary Table 3) were not induced in the *nhr-49(et13)* gain-of-  
268 function mutant. It is possible that *nhr-49* regulates autophagy indirectly in a manner independent of  
269 transcription, or that this *et13* mutation, which has combined gain and loss of function properties (K.  
270 Lee et al., 2016), cannot induce these tested autophagy genes. It is also possible that, to induce these  
271 genes, NHR-49 acts in concert with another hypoxia-responsive transcription factor, which is not  
272 activated in the *nhr-49(et13)* mutant. Together, this shows that NHR-49 is sufficient to extend survival  
273 of worms in hypoxia in various tissues, but the gain-of-function strain is only able to induce certain  
274 response genes without the presence of stress.

275

276 **The nuclear hormone receptor NHR-67 negatively regulates the *nhr-49* hypoxia response**

277 Cellular stress response pathways are intricate networks involving a multitude of proteins.  
278 Activation or repression of downstream response genes thus often requires signaling via additional  
279 factors such as kinases and transcription factors. To identify additional factors acting in the *nhr-49*  
280 regulated hypoxia response pathway, we studied proteins that have been reported to physically interact  
281 with NHR-49 (Reece-Hoyes et al., 2013). One such interaction partner is the nuclear hormone receptor  
282 NHR-67, the sole *C. elegans* ortholog of the *D. melanogaster tailless* and vertebrate *NR2E1* genes  
283 (Gissendanner et al., 2004). NHR-67 is important in neural and uterine development (Fernandes &  
284 Sternberg, 2007; Verghese et al., 2011), but a role for this NHR in stress responses has not yet been  
285 described. Our RNA-seq data showed that *nhr-67* mRNA expression is modestly increased during  
286 hypoxia in wild-type worms, and much more substantially induced in the *nhr-49* null background  
287 (Figure 5A), suggesting a possible regulatory interaction between these two NHRs during hypoxia. To  
288 explore this interaction further, we used feeding RNAi to knock down *nhr-67* in normoxia and hypoxia,  
289 and observed how this affected the expression of the *Pfmo-2::gfp* and *Pacs-2::gfp* transcriptional  
290 reporters. Compared to *EV(RNAi)*, knockdown of *nhr-67* significantly induced both reporters even in  
291 the absence of stress, suggesting a repressive role for *nhr-67* on these genes (Figure 5B-E). In hypoxia,  
292 *nhr-67(RNAi)* resulted in even higher expression of these reporters. In both normoxia and hypoxia,  
293 increased expression of the reporters was dependent on *nhr-49*, as loss of *nhr-49* abrogated the GFP  
294 induction (Figure 5B-E). The *nhr-49(et13)* gain-of-function mutation is sufficient to induce expression  
295 of the *Pfmo-2::gfp* reporter in non-stressed conditions (Goh et al., 2018), although it does not alter *nhr-*  
296 *67* expression under normoxic conditions (Supplementary Figure 5A). Knockdown of *nhr-67* further  
297 increased the expression of the *Pfmo-2::gfp* reporter in the *nhr-49(et13)* background in both normoxia  
298 and hypoxia (Supplementary Figure 5B, C). Together, these data suggest that *nhr-67* negatively  
299 regulates the expression of the hypoxia response genes *fmo-2* and *acs-2* in both normoxic and hypoxic  
300 conditions, and that this regulation is dependent on *nhr-49*.

301 As a negative regulator of *nhr-49*-dependent hypoxia response genes, it is possible that *nhr-67*  
302 acts upstream of *nhr-49* or directly on the promoter of *acs-2* and *fmo-2*. To determine how *nhr-67*  
303 regulates this response, we used feeding RNAi to knock down *nhr-67* and observed expression of the  
304 *P<sub>nhr-49</sub>::nhr-49::gfp* translational reporter (which encodes GFP tagged to a full length NHR-49  
305 transgene under control of its endogenous promoter from extra-chromosomal arrays, henceforth  
306 referred to as NHR-49::GFP; Ratnappan et al., 2014). The NHR-49::GFP protein is expressed most  
307 highly in the intestine, and also shows expression in neurons, muscle, and the hypodermis (Ratnappan  
308 et al., 2014). Whole worm NHR-49::GFP expression was increased in both normoxia and hypoxia  
309 following knockdown of *nhr-67*, with the highest increase observed in the intestine (Figure 5F, G).  
310 This suggests that *nhr-67* negatively regulates NHR-49, but in hypoxia, an increase in NHR-49 protein  
311 levels may in turn repress *nhr-67*, suggesting a negative feedback loop. The effects seen on *fmo-2* and  
312 *acs-2* expression are likely a consequence of NHR-67's effect on NHR-49.

313 Loss of function mutations in *nhr-67* cause early L1 lethality or arrest (Fernandes & Sternberg,  
314 2007), so we used feeding RNAi to study *nhr-67*'s functional requirements in hypoxia. We assessed the  
315 ability of *nhr-67(RNAi)* embryos to survive hypoxia and recover, as described above. Resembling *nhr-*  
316 *49(RNAi)* worms (46% survival), only 49% of *nhr-67* knockdown embryos survived to at least L4 stage  
317 compared to the *EV(RNAi)* worms (73%; Supplementary Figure 5D). Although RNAi knockdown of  
318 *nhr-67* and *nhr-49* causes developmental delays, the majority of *nhr-67(RNAi)* and *nhr-49(RNAi)*  
319 worms were able to reach at least L4 stage in normoxia (91% and 90%, respectively), resembling  
320 *EV(RNAi)* worms (100%; Supplementary Figure 5E, Supplementary Table 1). Thus, although *nhr-67*  
321 appears to perform a negative regulatory role on the hypoxia pathway, it, too, is functionally required  
322 for survival in hypoxia. Taken together, these data show that *nhr-67* is a functionally important  
323 negative regulator of the *nhr-49*-dependent hypoxia response.

324

325 **The kinase *hpk-1* positively regulates *nhr-49*-dependent hypoxia response genes and is required**  
326 **for survival in hypoxia**

327 To identify additional factors acting in the *nhr-49*-dependent hypoxia response pathway, we  
328 studied eight kinases that we found to potentially act in the *nhr-49*-dependent oxidative stress response  
329 (Doering & Taubert, manuscript in preparation). We depleted each kinase using feeding RNAi to  
330 determine if any treatment prevented *Pfmo-2::gfp* induction in hypoxia in the worm intestine. As  
331 expected, *nhr-49* RNAi diminished this intestinal fluorescence compared to the *EV(RNAi)* (Figure 6A,  
332 B). Of the eight kinases tested, RNAi knockdown of the nuclear serine/threonine kinase homeodomain  
333 interacting protein kinase 1 (*hpk-1*) significantly decreased intestinal *Pfmo-2::gfp* expression following  
334 hypoxia exposure (Figure 6A, B), phenocopying *nhr-49* knockdown. Knockdown of *hpk-1* also  
335 significantly reduced intestinal expression of the *Pacs-2::gfp* reporter in hypoxia (Figure 6C, D) and  
336 reduced expression of *Pfmo-2::gfp* in the *nhr-49(et13)* background (Supplementary Figure 6A, B). We  
337 corroborated these data using qRT-PCR in wild-type worms and a *hpk-1(pk1393)* mutant. The *pk1393*  
338 allele deletes the majority of the kinase domain of *hpk-1* and is a predicted molecular null allele (Raich  
339 et al., 2003). In hypoxia, the expression of both *acs-2* and *fmo-2* was significantly reduced by loss of  
340 *hpk-1*, phenocopying loss of *nhr-49* (Figure 6E). Together, these data suggest that, like *nhr-49*, *hpk-1* is  
341 required for upregulation of *fmo-2* and *acs-2* in response to hypoxia.

342 To determine if *hpk-1* is functionally required for worm survival in hypoxia, we assessed the  
343 ability of *hpk-1* mutant embryos to survive hypoxia. Similar to *nhr-49* mutant worms, only 45% of  
344 *hpk-1* mutant embryos developed to L4 (wild-type worms 92%; Figure 6F). We used epistasis analysis  
345 to test the hypothesis that *hpk-1* acts in the *nhr-49* pathway to coordinate a transcriptional response to  
346 hypoxia. We observed that the *nhr-49;hpk-1* double null mutant showed similar survival (26%) to each  
347 of the single null mutants, suggesting that these two genes act in the same hypoxia response pathway  
348 (Figure 6F). In contrast, the *hif-1;hpk-1* double null mutant was significantly impaired (<2%) compared  
349 to each of the single null mutants alone, consistent with the view that these two genes act in separate

350 response pathways (Figure 6G). Each mutant showed normal development from embryo to L4 in  
351 normoxia, indicating that the phenotypes observed were specifically due to the requirement of these  
352 genes in hypoxia survival (Supplementary Figure 6C, D, Supplementary Table 1). Taken together,  
353 these experiments show that *hpk-1* is required for embryo survival in hypoxia, consistent with it  
354 playing a role as an activator of the *nhr-49*-dependent response pathway.

355

### 356 **NHR-49 is regulated post-transcriptionally in hypoxia in an *hpk-1*-dependent fashion**

357 To test our hypothesis that HPK-1 activates NHR-49 in hypoxia, we examined whether NHR-  
358 49 is induced by hypoxia and whether *hpk-1* is involved in this regulation. NHR-49 and HPK-1 protein  
359 levels are increased in response to tert-butyl hydroperoxide and/or heat shock, respectively, but mRNA  
360 levels remain unchanged (Das et al., 2017; Goh et al., 2018). Similarly, we observed that *nhr-49* and  
361 *hpk-1* mRNA levels were not increased upon exposure to hypoxia (Figure 7A). Consistent with this, a  
362 transcriptional reporter of the *hpk-1* promoter fused to GFP (Das et al., 2017) was not induced  
363 following hypoxia exposure (Supplementary Figure 7A, B). These data show that transcription of  
364 neither *nhr-49* nor *hpk-1* are induced in hypoxia.

365 We considered the possibility that NHR-49 may be regulated post-transcriptionally. To assess  
366 NHR-49 protein levels, we used the translational NHR-49::GFP reporter to measure the expression of  
367 the fusion protein in response to hypoxia. Indeed, the whole worm NHR-49::GFP signal was modestly,  
368 but significantly induced upon exposure to hypoxia (Figure 7B, C). Interestingly, while *hpk-1* null  
369 mutation had no effect on NHR-49::GFP levels in normoxia, it abrogated the induction of the NHR-  
370 49::GFP signal by hypoxia (Figure 7B, C). This suggests that NHR-49 is regulated post-translationally  
371 in response to hypoxia, and that *hpk-1* may be involved in this regulation. Taken together, these data  
372 show that *hpk-1* is a functionally important upstream positive regulator of the *nhr-49*-dependent  
373 hypoxia response.

374



375 **Discussion**

376           Animals, tissues, and cells must be able to rapidly, flexibly, and reversibly adapt to a plethora of  
377 stresses. Past studies have identified many stress response factors, often termed master regulators.  
378 However, more recent studies indicate that stress response regulation requires the intricate interactions  
379 of multiple factors as part of networks that provide regulatory redundancy and flexibility. NHR-49 is a  
380 transcription factor that promotes longevity and development by regulating lipid metabolism and  
381 various stress responses (Chamoli et al., 2014; Dasgupta et al., 2020; Goh et al., 2018; Naim et al.,  
382 2020; Wani et al., 2020). Our data show that *nhr-49* coordinates a new aspect of the transcriptional  
383 response to hypoxia. This pathway operates in parallel to, and independent of, the canonical *hif-1*  
384 hypoxia response pathway. Besides *nhr-49*, it contains *nhr-67* and *hpk-1*. The former acts during  
385 normoxia to repress NHR-49; however, during hypoxia, an increase in NHR-49 protein levels in turn  
386 represses *nhr-67* levels, forming a feedback loop that may serve to reinforce NHR-49 activity. In  
387 contrast to *nhr-67*, the upstream kinase HPK-1 positively regulates the NHR-49 hypoxia response, as it  
388 is required to activate the NHR-49 regulated hypoxia response genes *fmo-2* and *acs-2* and to survive  
389 hypoxia. Downstream, NHR-49 induces autophagy genes, which are essential to promote hypoxia  
390 survival. Collectively, our experiments delineate a *hif-1*-independent hypoxia response pathway that  
391 contains distinct upstream and downstream components and is just as essential for hypoxia survival as  
392 is the *hif-1* pathway (Figure 8).

393

394 **NHR-49 controls a novel hypoxia response pathway that is parallel to canonical HIF signaling**

395           *nhr-49* is required to induce *fmo-2* in various stresses and infection models (Chamoli et al.,  
396 2014; Dasgupta et al., 2020; Goh et al., 2018; Naim et al., 2020; Wani et al., 2020). Similarly, HIF-1  
397 regulates *fmo-2* in several *C. elegans* longevity paradigms (Leiser et al., 2015), and *fmo-2* is induced in  
398 hypoxia, specifically 0.1% O<sub>2</sub> exposure, in a *hif-1*-dependent manner (Leiser et al., 2015; Shen et al.,  
399 2005). This raised the possibility that *hif-1* also promoted *fmo-2* expression in hypoxia (0.5% O<sub>2</sub>) in L4

400 or older worms, and, more generally, that *nhr-49* might act through *hif-1* in the hypoxia response.

401 However, several lines of evidence support a model whereby HIF-1 and NHR-49 are core components

402 of parallel, independent signaling networks (Figure 8). First, *hif-1* and *nhr-49* interact genetically in

403 hypoxia survival experiments, suggesting they work in separate genetic pathways (Figure 2A, B).

404 Second, our transcriptome analysis identified sets of genes that are regulated exclusively by HIF-1 or

405 NHR-49 (Figure 3A, B). Third, the kinase *hpk-1*, identified in a screen for new factors acting with

406 NHR-49 in *fmo-2* induction, also shows synthetic genetic interaction with *hif-1*, but not with *nhr-49*

407 (Figure 6F, G). Collectively these data show that *nhr-49* is a core part of a hypoxia response pathway

408 that is independent of *hif-1* signalling. In support of our study, a recent publication (Vozdek et al.,

409 2018) showed that *nhr-49* is required to induce the *hif-1*-independent hypoxia response gene *comt-5*

410 both in 0.5% O<sub>2</sub> and in a strain mutant for the kinase *hir-1*. In hypoxia, HIR-1 coordinates remodeling

411 of the extracellular matrix independently of HIF-1 (Vozdek et al., 2018). Thus, although our RNA-seq

412 results did not identify *comt-5* as a target of NHR-49 in hypoxia, this study supports the idea of a *hif-1*-

413 independent hypoxia response pathway involving *nhr-49*.

414

#### 415 **Homeodomain interacting protein kinases in hypoxia**

416 Our efforts to map additional components of the NHR-49 hypoxia response pathway, especially

417 factors acting in concert with NHR-49, revealed *hpk-1* (Figure 8). Homeodomain interacting protein

418 kinases (HIPKs) are a family of nuclear serine/threonine kinase that can phosphorylate transcription

419 factors (Rinaldo et al., 2007, 2008). The worm's only HIPK orthologue, *hpk-1*, regulates development

420 and the response to DNA damage, heat shock, and dietary restriction (Berber et al., 2013, 2016; Das et

421 al., 2017; Rinaldo et al., 2007). Here, we show that *hpk-1* is an upstream regulator of the *nhr-49*-

422 dependent hypoxia response pathway. Our data indicate that HPK-1 promotes the accumulation of

423 NHR-49 protein in hypoxia, leading to induction of NHR-49-dependent hypoxia response genes.

424 Interestingly, mammalian HIPK2 is degraded during periods of low oxygen via association with the E3

425 ubiquitin ligase SIAH2 (Calzado et al., 2009). This degradation of HIPK2 is necessary, as the protein  
426 normally represses the expression of HIF-1 $\alpha$  by binding at its promoter in cell culture (Nardinocchi et  
427 al., 2009). In contrast, HIPK2 is induced in and required to protect cardiomyocytes from  
428 hypoxia/reoxygenation induced injury (Dang et al., 2020). This is consistent with our data and suggests  
429 that protecting cells from hypoxic injury may be a conserved role of HIPKs. Future experiments may  
430 reveal how HPK-1 is regulating NHR-49, perhaps examining direct phosphorylation and activation of  
431 the NHR-49 protein by HIPK-1.

432

### 433 **Paradoxical regulation of the $\beta$ -oxidation gene *acs-2* by hypoxia**

434 Mitochondria consume cellular oxygen to produce energy and thus must adapt to limited  
435 oxygen availability. In particular, mitochondrial  $\beta$ -oxidation, the consumption of oxygen to catabolize  
436 fatty acids for energy production, is repressed in hypoxia in favour of anaerobic respiration. For  
437 example, the heart and skeletal muscle of mice and rats show decreased expression of key  $\beta$ -oxidation  
438 enzymes in acute hypoxia (Kennedy et al., 2001; Morash et al., 2013). In *C. elegans*, the acyl-CoA  
439 synthetase *acs-2* is part of the mitochondrial  $\beta$ -oxidation pathway, where it functions in the first step to  
440 activate fatty acids. NHR-49 activates *acs-2* expression during starvation, when  $\beta$ -oxidation is induced  
441 (M. R. Van Gilst et al., 2005). Considering this, *acs-2* expression would be expected to be  
442 downregulated in hypoxia due to reduced  $\beta$ -oxidation. Paradoxically, however, we found that *acs-2* is  
443 strongly induced in hypoxia and that this regulation depends on *nhr-49* (Figure 3C, Supplementary  
444 Figure 3A-C). Examination of other fatty acid  $\beta$ -oxidation enzymes in our RNA-seq data showed that  
445 *acs-2* is the only enzyme induced. This suggests that, during hypoxia, ACS-2 is not feeding its product  
446 fatty acyl-CoA into the  $\beta$ -oxidation cycle, but perhaps produces fatty acyl-CoA for anabolic functions  
447 needed for survival to or recovery from low oxygen, such as phospholipid or triglyceride synthesis  
448 (reviewed in Tang et al., 2018). Similar functions have been observed in human macrophages, which,  
449 during hypoxia, decrease  $\beta$ -oxidation but increase triglyceride synthesis (Boström et al., 2006).

450 In line with the repression of  $\beta$ -oxidation in hypoxia (Boström et al., 2006; Kennedy et al.,  
451 2001; Morash et al., 2013), there is evidence supporting a HIF-dependent down-regulation of the  
452 mammalian NHR-49 homolog PPAR $\alpha$ , which promotes  $\beta$ -oxidation (Atherton et al., 2008). For  
453 example, in human hepatocytes and in mouse liver sections, HIF-2 $\alpha$  accumulation in hypoxia directly  
454 suppresses PPAR $\alpha$  expression (J. Chen et al., 2019). Additionally, HIF-1 $\alpha$  suppresses PPAR $\alpha$  protein  
455 and mRNA levels during hypoxia in intestinal epithelial cells, and the *PPARA* promoter contains a  
456 HIF-1 $\alpha$  DNA binding consensus motif, suggesting direct control of *PPARA* by HIF transcription  
457 factors (Narravula & Colgan, 2001).

458 Some evidence suggests alternative actions of PPAR $\alpha$ . Knockdown of PPAR $\alpha$  attenuates the  
459 ability of Phd1 (the homolog of *C. elegans egl-9*) knockout myofibers to successfully tolerate hypoxia  
460 (Aragonés et al., 2008), suggesting that PPAR $\alpha$  is an important regulator of the hypoxia response  
461 downstream of Phd1. Along these lines, PPAR $\alpha$  protein levels increase in the muscle of Phd1 knockout  
462 mice (Aragonés et al., 2008) and following hypoxic exposure in mouse hearts (Morash et al., 2013).  
463 Similarly, we show that NHR-49 protein levels increase in response to hypoxia (Figure 7B, C), and that  
464 NHR-49 is a vital regulator of a *hif-1*-independent hypoxia response. Together, these data suggest that,  
465 similar to evidence from studies in mammalian systems, NHR-49 levels are increased and required in  
466 hypoxia, and may be regulating *acs-2* for functions other than fatty acid  $\beta$ -oxidation.

467  
468 **NHR-49 promotes autophagy activation to achieve hypoxia survival**

469 Damaged cellular components can be cleared via autophagy, a key process regulated by *nhr-49*  
470 in hypoxia (Figure 3D, F). In mammals, PPAR $\alpha$  activates autophagy in response to various stresses,  
471 including in neurons to clear A $\beta$  in Alzheimer's disease (Luo et al., 2020), and in the liver during  
472 inflammation (Jiao et al., 2014) and starvation (J. M. Lee et al., 2014). Proper regulation of autophagy  
473 is also a requirement in hypoxic conditions. Knockdown or genetic mutation of various *C. elegans*  
474 autophagy genes showed that they are required for worm survival when worms experience anoxia and

475 elevated temperatures combined (Samokhvalov et al., 2008). Similarly, Zhang *et al.* found that  
476 mitochondrial autophagy (mitophagy) is induced by hypoxia in mouse embryo fibroblasts. This process  
477 requires expression of BNIP3 (Bcl-2/E1B 19 kDa-interacting protein 3), an autophagy inducer, which  
478 is induced in a HIF-1-dependent manner (H. Zhang et al., 2008). In agreement with this, our RNA-seq  
479 data showed a 3.8-fold induction of the *C. elegans* BNIP3 homolog *dct-1* in hypoxia; however, this  
480 induction was dependent on neither *nhr-49* nor *hif-1*. The above study also found that the autophagy  
481 genes Beclin-1 and Atg5 are induced and required for cell survival in hypoxia (H. Zhang et al., 2008).  
482 Here, we show that the *C. elegans* ortholog of Beclin-1, *bec-1*, and the worm *atg-7* and *atg-10* genes,  
483 which are involved in the completion of the autophagosome along with *atg-5/Atg5*, are required for  
484 worm embryo survival to hypoxia in an *nhr-49*-dependent manner (Figure 3F). Interestingly, *hpk-1*  
485 regulates autophagy in response to dietary restriction, as it is necessary to induce autophagosome  
486 formation and autophagy gene expression (Das et al., 2017). *hpk-1* may thus aid *nhr-49* in the  
487 regulation of autophagy during hypoxia as well.

488

#### 489 **Cell non-autonomous functions of NHR-49 in hypoxia**

490 Cell non-autonomous regulation occurs in many pathways in *C. elegans*. For example, HIF-1  
491 acts in neurons to induce *fmo-2* expression in the intestine to promote longevity (Leiser et al., 2015).  
492 NHR-49 is expressed in the intestine, neurons, muscle, and hypodermis (Ratnappan et al., 2014). Re-  
493 expression of *nhr-49* in any one of these tissues is sufficient to enhance worm survival upon infection  
494 with the pathogens *S. aureus* (Wani et al., 2020) and to promote longevity in germline-less animals  
495 (Naim et al., 2020), but NHR-49 acts only in neurons to promote survival to *P. aeruginosa* (Naim et al.,  
496 2020). We thus aimed to identify the key tissue wherein NHR-49 promotes hypoxia survival.  
497 Surprisingly, we found that *nhr-49* expression in any of the intestine, neurons, or hypodermis is  
498 sufficient for whole animal survival to hypoxia (Figure 4B), suggesting that NHR-49 can act in a cell

499 non-autonomous fashion to execute its effects. Possibly, a signaling molecule whose synthesis is  
500 promoted by NHR-49 activity in any tissue promotes organismal hypoxia adaptation.

501           In sum, we show here that NHR-49 regulates a novel hypoxia response pathway that is  
502 independent of HIF-1 and controls an important transcriptional response for worm survival to hypoxia.  
503 If the mammalian NHR-49 homologs PPAR $\alpha$  and HNF4 play similar roles in the cellular response to  
504 hypoxia, our discovery could lead to the identification and development of new targets for drugs and  
505 therapies for diseases exhibiting hypoxic conditions.  
506

507 **Materials and Methods**

508 **Nematode strains and growth conditions**

509 We cultured *C. elegans* strains using standard techniques on nematode growth media (NGM)  
510 plates. To avoid background effects, each mutant was crossed into our lab N2 strain; original mutants  
511 were backcrossed to N2 at least six times. *E. coli* OP50 was the food source in all experiments except  
512 for RNAi experiments, where we used *E. coli* HT115. All experiments were carried out at 20°C. Worm  
513 strains used in this study are listed in Supplementary Table 6. For synchronized worm growths, we  
514 isolated embryos by standard sodium hypochlorite treatment. Isolated embryos were allowed to hatch  
515 overnight on unseeded NGM plates until the population reached a synchronized halted development at  
516 L1 stage via short-term fasting (12–24 hr). Synchronized L1 stage larvae were then transferred to OP50  
517 seeded plates and grown to the desired stage.

518

519 **Feeding RNA interference**

520 RNAi was performed on NGM plates supplemented with 25 µg/ml carbenicillin (BioBasic  
521 CDJ469), 1 mM IPTG (Santa Cruz CAS 367-93-1), and 12.5 µg/ml tetracycline (BioBasic TB0504  
522 (NGM-RNAi plates), and seeded with appropriate HT115 RNAi bacteria. The RNAi clones were from  
523 the Ahringer library (Source BioScience) and were sequenced prior to use.

524

525 **RNA isolation and qRT-PCR analysis**

526 Synchronized L1 worms were allowed to grow on OP50 plates for 48 hr to L4 stage, then either  
527 kept in 21% O<sub>2</sub> or transferred to 0.5% O<sub>2</sub> for 3 hr. RNA isolation was performed as previously  
528 described (Goh et al., 2014). 2 µg total RNA was used to generate cDNA with Superscript II reverse  
529 transcriptase (Invitrogen 18064-014), random primers (Invitrogen 48190-011), dNTPs (Fermentas  
530 R0186), and RNaseOUT (Invitrogen 10777-019). Quantitative PCR was performed in 10 µl reactions

531 using Fast SYBR Master Mix (Life Technologies 4385612), 1:10 diluted cDNA, and 5  $\mu$ M primer, and  
532 an analyzed with an Applied Biosystems StepOnePlus machine. We analyzed the data with the  $\Delta\Delta$ Ct  
533 method. For each sample, we calculated normalization factors by averaging the (sample  
534 expression)/(average reference expression) ratios of three normalization genes, *act-1*, *tba-1*, and *ubc-2*.  
535 The reference sample was *EV(RNAi)*, wild-type, or 21% O<sub>2</sub>, as appropriate. We used one-way ANOVA  
536 to calculate statistical significance of gene expression changes and corrected for multiple comparisons  
537 using the Tukey method. Primers were tested on serial cDNA dilutions and analyzed for PCR  
538 efficiency prior to use. All data originate from three or more independent biological repeats, and each  
539 PCR reaction was conducted in technical triplicate. Sequences of qRT-PCR primers are listed in  
540 Supplementary Table 7.

541

#### 542 **Analysis of fluorescent reporter lines via DIC and fluorescence microscopy**

543 To analyze fluorescence in reporter lines, egg lays were performed on NGM plates seeded with  
544 OP50 or RNAi plates seeded with the appropriate HT115 RNAi culture. Worms were allowed to grow  
545 to adulthood. Plates were then kept in 21% O<sub>2</sub> or transferred to 0.5% O<sub>2</sub> for 4 hr and allowed to recover  
546 for 1 hr in normoxia before imaging. Worms were collected into M9 buffer containing 0.06%  
547 levamisole (Sigma L9756) for immobilization on 2% (w/v) agarose pads for microscopy. We captured  
548 images on a CoolSnap HQ camera (Photometrics) attached to a Zeiss Axioplan 2 compound  
549 microscope, followed by MetaMorph Imaging Software with Autoquant 3D digital deconvolution. All  
550 images for the same experiment were captured at the same exposure time. Images were analyzed using  
551 ImageJ software (<https://imagej.nih.gov/ij/download.html>), with fluorescence calculated by taking the  
552 difference of the background fluorescence from the mean intestinal or whole worm fluorescence. For  
553 experiments imaging the *Pfmo-2::gfp* and *Pacs-2::gfp* reporters, intestinal fluorescence was measured.  
554 For experiments imaging the *Phpk-1::gfp*, *Pnhr-49::nhr-49::gfp*, or the *Phpk-1::hpk-1::gfp* reporters,



555 whole worm fluorescence was measured. For each experiment, at least three independent trials were  
556 performed with a minimum of 30 worms per condition.

557

### 558 **NHR-49 transgenic strains**

559 To construct the *Pnhr-49::nhr-49::gfp* containing plasmid, a 6.6 kb genomic fragment of the  
560 *nhr-49* gene (including a 4.4 kb coding region covering all *nhr-49* transcripts and a 2.2 kb promoter  
561 region) was cloned into the GFP expression vector pPD95.77 (Addgene #1495), as reported previously  
562 (Ratnappan et al., 2014). For generating tissue-specific constructs, the *nhr-49* promoter was replaced  
563 with tissue-specific promoters using *SbfI* and *SalI* restriction enzymes to create plasmids for expressing  
564 NHR-49 in the muscle (*Pmyo-3::nhr-49::gfp*), intestine (*Pgly-19::nhr-49::gfp*), hypodermis (*Pcol-  
565 12::nhr-49::gfp*), and neurons (*Prgef-1::nhr-49::gfp*). 100 ng/μl of each plasmid was injected, along  
566 with pharyngeal muscle-specific *Pmyo-2::mCherry* as a co-injection marker (25 ng/μl) into the *nhr-  
567 49(nr2041)* mutant strain using standard methods (Mello & Fire, 1995). Strains were maintained by  
568 picking animals that were positive for both GFP and mCherry.

569

### 570 **Hypoxia sensitivity assays**

571 Hypoxic conditions were maintained using continuous flow chambers, as previously described  
572 (Fawcett et al., 2012). Compressed gas tanks (5000 ppm O<sub>2</sub> balanced with N<sub>2</sub>) were certified as  
573 standard to within 2% of indicated concentration from Praxair Canada (Delta, BC). Oxygen flow was  
574 regulated using Aalborg rotameters (Aalborg Instruments and Controls, Inc., Orangeburg, NY, USA).  
575 Hypoxic chambers (and room air controls) were maintained in a 20°C incubator for the duration of the  
576 experiments.

577 For embryo survival assays, gravid first-day adult worms (picked as L4 the previous day) were  
578 allowed to lay eggs for 1-4 hr on plates seeded with 15 uL OP50 or appropriate HT115 RNAi bacteria  
579 the previous day. Adults were removed, and eggs were exposed to 0.5% O<sub>2</sub> for 24 hr or 48 hr. Animals

580 were scored for developmental success (reached at least L4 stage) after being placed back into room air  
581 for 65 hr (following 24 hr exposure) or 42 hr (following 48 hr exposure). For RNAi survival assays,  
582 worms were grown for one generation from egg to adult on the appropriate HT115 RNAi bacteria  
583 before their progeny was used for the egg lay.

584 For larval development assays, gravid adult worms (picked as L4 the previous day) were  
585 allowed to lay eggs for 2 hr and kept at 20°C for 13-17 hr to allow hatching (egg lays for *nhr-*  
586 *49(nr2041)* strains with embryonic developmental delays were performed 2 hr earlier to ensure  
587 synchronization with wild-type worms). Freshly hatched L1 worms were transferred to plates seeded  
588 with 15µL OP50 the previous day, and exposed to 0.5% O<sub>2</sub> for 48 hr. Animals were placed back into  
589 room air and immediately scored for stage.

590 For all normoxia (21% O<sub>2</sub>) comparison experiments, methods were as described above except  
591 plates were kept in room air for the duration (instead of being exposed to 0.5% O<sub>2</sub>).

592

### 593 **Hydrogen sulfide sensitivity assay**

594 Construction of H<sub>2</sub>S chambers was as previously described (Fawcett et al., 2012; Miller &  
595 Roth, 2007). In short, 5000 ppm H<sub>2</sub>S (balanced with N<sub>2</sub>) was diluted with room air to a final  
596 concentration of 50 ppm and monitored with a custom H<sub>2</sub>S detector, as described (Miller & Roth,  
597 2007). Compressed gas mixtures were obtained from Airgas (Seattle, WA) and certified as standard to  
598 within 2% of the indicated concentration. Survival assays were performed with 20 L4 animals picked  
599 onto OP50 seeded plates. Plates were exposed to 50 ppm H<sub>2</sub>S for 24 hr in a 20°C incubator, then  
600 returned to room air to score viability. Animals were scored 30 min after removal from H<sub>2</sub>S, and plates  
601 with dead animals were re-examined after several hours to ensure animals had not reanimated.

602

### 603 **RNA sequencing**

604 Synchronized L1 wild-type, *nhr-49(nr2041)*, and *hif-1(ia4)* worms were allowed to grow on  
605 OP50 plates to L4 stage, then either kept in 21% O<sub>2</sub> or transferred to 0.5% O<sub>2</sub> for 3 hr. RNA was  
606 isolated from whole worms as described above. RNA integrity and quality were ascertained on a  
607 BioAnalyzer. Construction of strand-specific mRNA sequencing libraries and sequencing (75bp PET)  
608 on an Illumina HiSeq 2500 machine was done at the Sequencing Services facility of the Genome  
609 Sciences Centre, BC Cancer Agency, Vancouver BC, Canada  
610 (<https://www.bcgsc.ca/services/sequencing-services>). The raw FASTQ reads obtained from the facility  
611 were trimmed using Trimmomatic version 0.36 (Bolger et al., 2014) with parameters LEADING:3  
612 TRAILING:3 SLIDINGWINDOW:4:15 MINLEN:36. Next, the trimmed reads were aligned to the  
613 NCBI reference genome WBcel235 WS277  
614 ([https://www.ncbi.nlm.nih.gov/assembly/GCF\\_000002985.6/](https://www.ncbi.nlm.nih.gov/assembly/GCF_000002985.6/)) using Salmon version 0.9.1 (Patro et al.,  
615 2017) with parameters -l A -p 8 --gcBias. Then, transcript-level read counts were imported into R and  
616 summed into gene-level read counts using tximport (Soneson et al., 2015). Genes not expressed at a  
617 level greater than 1 count per million (CPM) reads in at least three of the samples were excluded from  
618 further analysis. The gene-level read counts were normalized using the trimmed mean of M-values  
619 (TMM) in edgeR (Robinson et al., 2010) to adjust samples for differences in library size. Differential  
620 expression analysis was performed using the quasi-likelihood F-test with the generalized linear model  
621 (GLM) approach in edgeR (Robinson et al., 2010). Differentially expressed genes (DEGs) were defined  
622 as those with at least two-fold difference between two individual groups at a false discovery rate  
623 (FDR) < 0.05. RNA-seq data have been deposited at NCBI Gene Expression Omnibus  
624 (<https://www.ncbi.nlm.nih.gov/geo/>) under the record GSE166788.

625 Functional enrichment analysis and visualization were performed using the Overrepresentation  
626 Analysis (ORA) module with the default parameters in easyGSEA in the eVITTA suite  
627 (<https://tau.cmmt.ubc.ca/eVITTA/>; Cheng X., Yan J., et al., in preparation). easyVizR in the eVITTA  
628 suite was used to visualize the overlaps and disjoints in the DEGs (input December 14, 2020).

630 **Acknowledgements**

631           We thank the Taubert, Miller, and Ghazi labs for comments on the manuscript. Some strains  
632 were provided by the CGC, which is funded by NIH Office of Research Infrastructure Programs (P40  
633 OD010440). Grant support was from The Canadian Institutes of Health Research (CIHR; PJT-153199  
634 to ST), the Natural Sciences and Engineering Research Council of Canada (NSERC; RGPIN-2018-  
635 05133 to ST), the Cancer Research Society (CRS; to ST), and the National Institutes of Health (NIH;  
636 R01AG051659 to AG, R01AG044378 to DM). KRSD was supported by NSERC CGS-M, NSERC  
637 CGS-D, and BCCHR scholarships, and ST by a Canada Research Chair.

638

639 **Competing interests**

640           The authors do not declare any competing interests.

641

642 **References**

- 643 Albadari, N., Deng, S., & Li, W. (2019). The transcriptional factors HIF-1 and HIF-2 and their novel  
644 inhibitors in cancer therapy. *Expert Opinion on Drug Discovery*, *14*(7), 667–682.  
645 <https://doi.org/10.1080/17460441.2019.1613370>
- 646 Aragonés, J., Schneider, M., Van Geyte, K., Fraisl, P., Dresselaers, T., Mazzone, M., Dirkx, R.,  
647 Zacchigna, S., Lemieux, H., Jeoung, N. H., Lambrechts, D., Bishop, T., Lafuste, P., Diez-Juan,  
648 A., Harten, S. K., Van Noten, P., De Bock, K., Willam, C., Tjwa, M., ... Carmeliet, P. (2008).  
649 Deficiency or inhibition of oxygen sensor Phd1 induces hypoxia tolerance by reprogramming  
650 basal metabolism. *Nature Genetics*, *40*(2), 170–180. <https://doi.org/10.1038/ng.2007.62>
- 651 Atherton, H. J., Jones, O. A. H., Malik, S., Miska, E. A., & Griffin, J. L. (2008). A comparative  
652 metabolomic study of NHR-49 in *Caenorhabditis elegans* and PPAR- $\alpha$  in the mouse. *FEBS*  
653 *Letters*, *582*(12), 1661–1666. <https://doi.org/10.1016/j.febslet.2008.04.020>
- 654 Berber, S., Llamosas, E., Thaivalappil, P., Boag, P. R., Crossley, M., & Nicholas, H. R. (2013).  
655 Homeodomain interacting protein kinase (HPK-1) is required in the soma for robust germline  
656 proliferation in *C. elegans*: HPK-1 Promotes Germline Proliferation. *Developmental Dynamics*,  
657 *242*(11), 1250–1261. <https://doi.org/10.1002/dvdy.24023>
- 658 Berber, S., Wood, M., Llamosas, E., Thaivalappil, P., Lee, K., Liao, B. M., Chew, Y. L., Rhodes, A.,  
659 Yucel, D., Crossley, M., & Nicholas, H. R. (2016). Homeodomain-Interacting Protein Kinase  
660 (HPK-1) regulates stress responses and ageing in *C. elegans*. *Scientific Reports*, *6*(1), 19582.  
661 <https://doi.org/10.1038/srep19582>
- 662 Bishop, T., Lau, K. W., Epstein, A. C. R., Kim, S. K., Jiang, M., O'Rourke, D., Pugh, C. W., Gleadle,  
663 J. M., Taylor, M. S., Hodgkin, J., & Ratcliffe, P. J. (2004). Genetic analysis of pathways  
664 regulated by the von Hippel-Lindau tumor suppressor in *Caenorhabditis elegans*. *PLoS Biology*,  
665 *2*(10), e289. <https://doi.org/10.1371/journal.pbio.0020289>

- 666 Bolger, A. M., Lohse, M., & Usadel, B. (2014). Trimmomatic: A flexible trimmer for Illumina  
667 sequence data. *Bioinformatics*, 30(15), 2114–2120.  
668 <https://doi.org/10.1093/bioinformatics/btu170>
- 669 Boström, P., Magnusson, B., Svensson, P.-A., Wiklund, O., Borén, J., Carlsson, L. M. S., Ståhlman,  
670 M., Olofsson, S.-O., & Hultén, L. M. (2006). Hypoxia Converts Human Macrophages Into  
671 Triglyceride-Loaded Foam Cells. *Arteriosclerosis, Thrombosis, and Vascular Biology*, 26(8),  
672 1871–1876. <https://doi.org/10.1161/01.ATV.0000229665.78997.0b>
- 673 Brenner, S. (1974). The genetics of *Caenorhabditis elegans*. *Genetics*, 77(1), 71–94.
- 674 Budde, M. W., & Roth, M. B. (2010). Hydrogen sulfide increases hypoxia-inducible factor-1 activity  
675 independently of von Hippel-Lindau tumor suppressor-1 in *C. elegans*. *Molecular Biology of*  
676 *the Cell*, 21(1), 212–217. <https://doi.org/10.1091/mbc.e09-03-0199>
- 677 Burkewitz, K., Morante, I., Weir, H. J. M., Yeo, R., Zhang, Y., Huynh, F. K., Ilkayeva, O. R.,  
678 Hirsche, M. D., Grant, A. R., & Mair, W. B. (2015). Neuronal CRTC-1 governs systemic  
679 mitochondrial metabolism and lifespan via a catecholamine signal. *Cell*, 160(5), 842–855.  
680 <https://doi.org/10.1016/j.cell.2015.02.004>
- 681 Calzado, M. A., de la Vega, L., Möller, A., Bowtell, D. D. L., & Schmitz, M. L. (2009). An inducible  
682 autoregulatory loop between HIPK2 and Siah2 at the apex of the hypoxic response. *Nature Cell*  
683 *Biology*, 11(1), 85–91. <https://doi.org/10.1038/ncb1816>
- 684 Chamoli, M., Singh, A., Malik, Y., & Mukhopadhyay, A. (2014). A novel kinase regulates dietary  
685 restriction-mediated longevity in *Caenorhabditis elegans*. *Aging Cell*, 13(4), 641–655.  
686 <https://doi.org/10.1111/acel.12218>
- 687 Chapin, H. C., Okada, M., Merz, A. J., & Miller, D. L. (2015). Tissue-specific autophagy responses to  
688 aging and stress in *C. elegans*. *Aging*, 7(6), 419–434. <https://doi.org/10.18632/aging.100765>
- 689 Chen, J., Chen, J., Fu, H., Li, Y., Wang, L., Luo, S., & Lu, H. (2019). Hypoxia exacerbates  
690 nonalcoholic fatty liver disease via the HIF-2 $\alpha$ /PPAR $\alpha$  pathway. *American Journal of*

- 691 *Physiology-Endocrinology and Metabolism*, 317(4), E710–E722.
- 692 <https://doi.org/10.1152/ajpendo.00052.2019>
- 693 Chen, W., Hill, H., Christie, A., Kim, M. S., Holloman, E., Pavia-Jimenez, A., Homayoun, F., Ma, Y.,  
694 Patel, N., Yell, P., Hao, G., Yousuf, Q., Joyce, A., Pedrosa, I., Geiger, H., Zhang, H., Chang, J.,  
695 Gardner, K. H., Bruick, R. K., ... Brugarolas, J. (2016). Targeting renal cell carcinoma with a  
696 HIF-2 antagonist. *Nature*, 539(7627), 112–117. <https://doi.org/10.1038/nature19796>
- 697 Cho, H., Du, X., Rizzi, J. P., Liberzon, E., Chakraborty, A. A., Gao, W., Carvo, I., Signoretti, S.,  
698 Bruick, R. K., Josey, J. A., Wallace, E. M., & Kaelin, W. G. (2016). On-target efficacy of a  
699 HIF-2 $\alpha$  antagonist in preclinical kidney cancer models. *Nature*, 539(7627), 107–111.  
700 <https://doi.org/10.1038/nature19795>
- 701 Choudhry, H., & Harris, A. L. (2018). Advances in Hypoxia-Inducible Factor Biology. *Cell*  
702 *Metabolism*, 27(2), 281–298. <https://doi.org/10.1016/j.cmet.2017.10.005>
- 703 Dang, X., Zhang, R., Peng, Z., Qin, Y., Sun, J., Niu, Z., & Pei, H. (2020). HIPK2 overexpression  
704 relieves hypoxia/reoxygenation-induced apoptosis and oxidative damage of cardiomyocytes  
705 through enhancement of the Nrf2/ARE signaling pathway. *Chemico-Biological Interactions*,  
706 316, 108922. <https://doi.org/10.1016/j.cbi.2019.108922>
- 707 Das, R., Melo, J. A., Thondamal, M., Morton, E. A., Cornwell, A. B., Crick, B., Kim, J. H., Swartz, E.  
708 W., Lamitina, T., Douglas, P. M., & Samuelson, A. V. (2017). The homeodomain-interacting  
709 protein kinase HPK-1 preserves protein homeostasis and longevity through master regulatory  
710 control of the HSF-1 chaperone network and TORC1-restricted autophagy in *Caenorhabditis*  
711 *elegans*. *PLOS Genetics*, 13(10), e1007038. <https://doi.org/10.1371/journal.pgen.1007038>
- 712 Dasgupta, M., Shashikanth, M., Gupta, A., Sandhu, A., De, A., Javed, S., & Singh, V. (2020). NHR-49  
713 Transcription Factor Regulates Immunometabolic Response and Survival of *Caenorhabditis*  
714 *elegans* during *Enterococcus faecalis* Infection. *Infection and Immunity*, 88(8).  
715 <https://doi.org/10.1128/IAI.00130-20>

- 716 Epstein, A. C., Gleadle, J. M., McNeill, L. A., Hewitson, K. S., O'Rourke, J., Mole, D. R., Mukherji,  
717 M., Metzen, E., Wilson, M. I., Dhandu, A., Tian, Y. M., Masson, N., Hamilton, D. L., Jaakkola,  
718 P., Barstead, R., Hodgkin, J., Maxwell, P. H., Pugh, C. W., Schofield, C. J., & Ratcliffe, P. J.  
719 (2001). *C. elegans* EGL-9 and mammalian homologs define a family of dioxygenases that  
720 regulate HIF by prolyl hydroxylation. *Cell*, *107*(1), 43–54. [https://doi.org/10.1016/s0092-](https://doi.org/10.1016/s0092-8674(01)00507-4)  
721 [8674\(01\)00507-4](https://doi.org/10.1016/s0092-8674(01)00507-4)
- 722 Fallah, J., & Rini, B. I. (2019). HIF Inhibitors: Status of Current Clinical Development. *Current*  
723 *Oncology Reports*, *21*(1), 6. <https://doi.org/10.1007/s11912-019-0752-z>
- 724 Fawcett, E. M., Horsman, J. W., & Miller, D. L. (2012). Creating defined gaseous environments to  
725 study the effects of hypoxia on *C. elegans*. *Journal of Visualized Experiments: JoVE*, *65*, e4088.  
726 <https://doi.org/10.3791/4088>
- 727 Fernandes, J. S., & Sternberg, P. W. (2007). The tailless Ortholog nhr-67 Regulates Patterning of Gene  
728 Expression and Morphogenesis in the *C. elegans* Vulva. *PLoS Genetics*, *3*(4), e69.  
729 <https://doi.org/10.1371/journal.pgen.0030069>
- 730 Gissendanner, C. R., Crossgrove, K., Kraus, K. A., Maina, C. V., & Sluder, A. E. (2004). Expression  
731 and function of conserved nuclear receptor genes in *Caenorhabditis elegans*. *Developmental*  
732 *Biology*, *266*(2), 399–416. <https://doi.org/10.1016/j.ydbio.2003.10.014>
- 733 Goh, G. Y. S., Martelli, K. L., Parhar, K. S., Kwong, A. W. L., Wong, M. A., Mah, A., Hou, N. S., &  
734 Taubert, S. (2014). The conserved Mediator subunit MDT-15 is required for oxidative stress  
735 responses in *Caenorhabditis elegans*. *Aging Cell*, *13*(1), 70–79.  
736 <https://doi.org/10.1111/accel.12154>
- 737 Goh, G. Y. S., Winter, J. J., Bhansali, F., Doering, K. R. S., Lai, R., Lee, K., Veal, E. A., & Taubert,  
738 S. (2018). NHR-49/HNF4 integrates regulation of fatty acid metabolism with a protective  
739 transcriptional response to oxidative stress and fasting. *Aging Cell*, *17*(3), e12743.  
740 <https://doi.org/10.1111/accel.12743>



- 741 Jiang, H., Guo, R., & Powell-Coffman, J. A. (2001). The *Caenorhabditis elegans* hif-1 gene encodes a  
742 bHLH-PAS protein that is required for adaptation to hypoxia. *Proceedings of the National*  
743 *Academy of Sciences of the United States of America*, 98(14), 7916–7921.  
744 <https://doi.org/10.1073/pnas.141234698>
- 745 Jiao, M., Ren, F., Zhou, L., Zhang, X., Zhang, L., Wen, T., Wei, L., Wang, X., Shi, H., Bai, L., Zhang,  
746 X., Zheng, S., Zhang, J., Chen, Y., Han, Y., Zhao, C., & Duan, Z. (2014). Peroxisome  
747 proliferator-activated receptor  $\alpha$  activation attenuates the inflammatory response to protect the  
748 liver from acute failure by promoting the autophagy pathway. *Cell Death & Disease*, 5, e1397.  
749 <https://doi.org/10.1038/cddis.2014.361>
- 750 Kaelin, W. G. (2008). The von Hippel-Lindau tumour suppressor protein: O<sub>2</sub> sensing and cancer.  
751 *Nature Reviews. Cancer*, 8(11), 865–873. <https://doi.org/10.1038/nrc2502>
- 752 Keith, B., & Simon, M. C. (2007). Hypoxia-inducible factors, stem cells, and cancer. *Cell*, 129(3),  
753 465–472. <https://doi.org/10.1016/j.cell.2007.04.019>
- 754 Kennedy, S. L., Stanley, W. C., Panchal, A. R., & Mazzeo, R. S. (2001). Alterations in enzymes  
755 involved in fat metabolism after acute and chronic altitude exposure. *Journal of Applied*  
756 *Physiology (Bethesda, Md.: 1985)*, 90(1), 17–22. <https://doi.org/10.1152/jappl.2001.90.1.17>
- 757 Lee, J. M., Wagner, M., Xiao, R., Kim, K. H., Feng, D., Lazar, M. A., & Moore, D. D. (2014).  
758 Nutrient-sensing nuclear receptors coordinate autophagy. *Nature*, 516(7529), 112–115.  
759 <https://doi.org/10.1038/nature13961>
- 760 Lee, K., Goh, G. Y. S., Wong, M. A., Klassen, T. L., & Taubert, S. (2016). Gain-of-Function Alleles in  
761 *Caenorhabditis elegans* Nuclear Hormone Receptor nhr-49 Are Functionally Distinct. *PloS One*,  
762 11(9), e0162708. <https://doi.org/10.1371/journal.pone.0162708>
- 763 Lee, P., Chandel, N. S., & Simon, M. C. (2020). Cellular adaptation to hypoxia through hypoxia  
764 inducible factors and beyond. *Nature Reviews. Molecular Cell Biology*, 21(5), 268–283.  
765 <https://doi.org/10.1038/s41580-020-0227-y>

- 766 Leiser, S. F., Miller, H., Rossner, R., Fletcher, M., Leonard, A., Primitivo, M., Rintala, N., Ramos, F.  
767 J., Miller, D. L., & Kaeberlein, M. (2015). Cell nonautonomous activation of flavin-containing  
768 monooxygenase promotes longevity and health span. *Science (New York, N.Y.)*, *350*(6266),  
769 1375–1378. <https://doi.org/10.1126/science.aac9257>
- 770 Li, L., Rose, P., & Moore, P. K. (2011). Hydrogen sulfide and cell signaling. *Annual Review of*  
771 *Pharmacology and Toxicology*, *51*, 169–187. [https://doi.org/10.1146/annurev-pharmtox-](https://doi.org/10.1146/annurev-pharmtox-010510-100505)  
772 [010510-100505](https://doi.org/10.1146/annurev-pharmtox-010510-100505)
- 773 Li, M., & Kim, W. Y. (2011). Two sides to every story: The HIF-dependent and HIF-independent  
774 functions of pVHL. *Journal of Cellular and Molecular Medicine*, *15*(2), 187–195.  
775 <https://doi.org/10.1111/j.1582-4934.2010.01238.x>
- 776 Li, Y., Padmanabha, D., Gentile, L. B., Dumur, C. I., Beckstead, R. B., & Baker, K. D. (2013). HIF-  
777 and non-HIF-regulated hypoxic responses require the estrogen-related receptor in *Drosophila*  
778 *melanogaster*. *PLoS Genetics*, *9*(1), e1003230. <https://doi.org/10.1371/journal.pgen.1003230>
- 779 Liu, L. X., Spoerke, J. M., Mulligan, E. L., Chen, J., Reardon, B., Westlund, B., Sun, L., Abel, K.,  
780 Armstrong, B., Hardiman, G., King, J., McCague, L., Basson, M., Clover, R., & Johnson, C. D.  
781 (1999). High-throughput isolation of *Caenorhabditis elegans* deletion mutants. *Genome*  
782 *Research*, *9*(9), 859–867. <https://doi.org/10.1101/gr.9.9.859>
- 783 Luo, R., Su, L.-Y., Li, G., Yang, J., Liu, Q., Yang, L.-X., Zhang, D.-F., Zhou, H., Xu, M., Fan, Y., Li,  
784 J., & Yao, Y.-G. (2020). Activation of PPARA-mediated autophagy reduces Alzheimer disease-  
785 like pathology and cognitive decline in a murine model. *Autophagy*, *16*(1), 52–69.  
786 <https://doi.org/10.1080/15548627.2019.1596488>
- 787 Mello, C., & Fire, A. (1995). DNA transformation. *Methods in Cell Biology*, *48*, 451–482.
- 788 Miller, D. L., Budde, M. W., & Roth, M. B. (2011). HIF-1 and SKN-1 coordinate the transcriptional  
789 response to hydrogen sulfide in *Caenorhabditis elegans*. *PloS One*, *6*(9), e25476.  
790 <https://doi.org/10.1371/journal.pone.0025476>

- 791 Miller, D. L., & Roth, M. B. (2007). Hydrogen sulfide increases thermotolerance and lifespan in  
792 *Caenorhabditis elegans*. *Proceedings of the National Academy of Sciences of the United States*  
793 *of America*, 104(51), 20618–20622. <https://doi.org/10.1073/pnas.0710191104>
- 794 Morash, A. J., Kotwica, A. O., & Murray, A. J. (2013). Tissue-specific changes in fatty acid oxidation  
795 in hypoxic heart and skeletal muscle. *American Journal of Physiology. Regulatory, Integrative*  
796 *and Comparative Physiology*, 305(5), R534-541. <https://doi.org/10.1152/ajpregu.00510.2012>
- 797 Naim, N., Amrit, F. R., Ratnappan, R., DelBuono, N., Loose, J. A., & Ghazi, A. (2020). *NHR-49 Acts*  
798 *in Distinct Tissues to Promote Longevity versus Innate Immunity* [Preprint]. *Molecular Biology*.  
799 <https://doi.org/10.1101/2020.09.11.290452>
- 800 Nardinocchi, L., Puca, R., Guidolin, D., Belloni, A. S., Bossi, G., Michiels, C., Sacchi, A., Onisto, M.,  
801 & D’Orazi, G. (2009). Transcriptional regulation of hypoxia-inducible factor 1alpha by HIPK2  
802 suggests a novel mechanism to restrain tumor growth. *Biochimica Et Biophysica Acta*, 1793(2),  
803 368–377. <https://doi.org/10.1016/j.bbamcr.2008.10.013>
- 804 Narravula, S., & Colgan, S. P. (2001). Hypoxia-Inducible Factor 1-Mediated Inhibition of Peroxisome  
805 Proliferator-Activated Receptor  $\alpha$  Expression During Hypoxia. *The Journal of Immunology*,  
806 166(12), 7543–7548. <https://doi.org/10.4049/jimmunol.166.12.7543>
- 807 Nystul, T. G., & Roth, M. B. (2004). Carbon monoxide-induced suspended animation protects against  
808 hypoxic damage in *Caenorhabditis elegans*. *Proceedings of the National Academy of Sciences*  
809 *of the United States of America*, 101(24), 9133–9136. <https://doi.org/10.1073/pnas.0403312101>
- 810 Padmanabha, D., Padilla, P. A., You, Y.-J., & Baker, K. D. (2015). A HIF-independent mediator of  
811 transcriptional responses to oxygen deprivation in *Caenorhabditis elegans*. *Genetics*, 199(3),  
812 739–748. <https://doi.org/10.1534/genetics.114.173989>
- 813 Pathare, P. P., Lin, A., Bornfeldt, K. E., Taubert, S., & Van Gilst, M. R. (2012). Coordinate regulation  
814 of lipid metabolism by novel nuclear receptor partnerships. *PLoS Genetics*, 8(4), e1002645.  
815 <https://doi.org/10.1371/journal.pgen.1002645>

- 816 Patro, R., Duggal, G., Love, M. I., Irizarry, R. A., & Kingsford, C. (2017). Salmon: Fast and bias-aware  
817 quantification of transcript expression using dual-phase inference. *Nature Methods*, *14*(4), 417.  
818 <https://doi.org/10.1038/nmeth.4197>
- 819 Powell-Coffman, J. A. (2010). Hypoxia signaling and resistance in *C. elegans*. *Trends in*  
820 *Endocrinology and Metabolism: TEM*, *21*(7), 435–440.  
821 <https://doi.org/10.1016/j.tem.2010.02.006>
- 822 Pursiheimo, J.-P., Rantanen, K., Heikkinen, P. T., Johansen, T., & Jaakkola, P. M. (2009). Hypoxia-  
823 activated autophagy accelerates degradation of SQSTM1/p62. *Oncogene*, *28*(3), 334–344.  
824 <https://doi.org/10.1038/onc.2008.392>
- 825 Raich, W. B., Moorman, C., Lacefield, C. O., Lehrer, J., Bartsch, D., Plasterk, R. H. A., Kandel, E. R.,  
826 & Hobert, O. (2003). Characterization of *Caenorhabditis elegans* homologs of the Down  
827 syndrome candidate gene DYRK1A. *Genetics*, *163*(2), 571–580.
- 828 Rankin, E. B., & Giaccia, A. J. (2016). Hypoxic control of metastasis. *Science (New York, N.Y.)*,  
829 *352*(6282), 175–180. <https://doi.org/10.1126/science.aaf4405>
- 830 Ratnappan, R., Amrit, F. R. G., Chen, S.-W., Gill, H., Holden, K., Ward, J., Yamamoto, K. R., Olsen,  
831 C. P., & Ghazi, A. (2014). Germline signals deploy NHR-49 to modulate fatty-acid  $\beta$ -oxidation  
832 and desaturation in somatic tissues of *C. elegans*. *PLoS Genetics*, *10*(12), e1004829.  
833 <https://doi.org/10.1371/journal.pgen.1004829>
- 834 Reece-Hoyes, J. S., Pons, C., Diallo, A., Mori, A., Shrestha, S., Kadreppa, S., Nelson, J., DiPrima, S.,  
835 Dricot, A., Lajoie, B. R., Ribeiro, P. S. M., Weirauch, M. T., Hill, D. E., Hughes, T. R., Myers,  
836 C. L., & Walhout, A. J. M. (2013). Extensive Rewiring and Complex Evolutionary Dynamics in  
837 a *C. elegans* Multiparameter Transcription Factor Network. *Molecular Cell*, *51*(1), 116–127.  
838 <https://doi.org/10.1016/j.molcel.2013.05.018>

- 839 Rinaldo, C., Prodosmo, A., Siepi, F., & Soddu, S. (2007). HIPK2: A multitasking partner for  
840 transcription factors in DNA damage response and development. *Biochemistry and Cell Biology*  
841 = *Biochimie Et Biologie Cellulaire*, 85(4), 411–418. <https://doi.org/10.1139/O07-071>
- 842 Rinaldo, C., Siepi, F., Prodosmo, A., & Soddu, S. (2008). HIPKs: Jack of all trades in basic nuclear  
843 activities. *Biochimica Et Biophysica Acta*, 1783(11), 2124–2129.  
844 <https://doi.org/10.1016/j.bbamcr.2008.06.006>
- 845 Robinson, M. D., McCarthy, D. J., & Smyth, G. K. (2010). edgeR: A Bioconductor package for  
846 differential expression analysis of digital gene expression data. *Bioinformatics*, 26(1), 139–140.  
847 <https://doi.org/10.1093/bioinformatics/btp616>
- 848 Samokhvalov, V., Scott, B. A., & Crowder, C. M. (2008). Autophagy protects against hypoxic injury in  
849 *C. elegans*. *Autophagy*, 4(8), 1034–1041. <https://doi.org/10.4161/auto.6994>
- 850 Schito, L., & Semenza, G. L. (2016). Hypoxia-Inducible Factors: Master Regulators of Cancer  
851 Progression. *Trends in Cancer*, 2(12), 758–770. <https://doi.org/10.1016/j.trecan.2016.10.016>
- 852 Shen, C., Nettleton, D., Jiang, M., Kim, S. K., & Powell-Coffman, J. A. (2005). Roles of the HIF-1  
853 hypoxia-inducible factor during hypoxia response in *Caenorhabditis elegans*. *The Journal of*  
854 *Biological Chemistry*, 280(21), 20580–20588. <https://doi.org/10.1074/jbc.M501894200>
- 855 Sonesson, C., Love, M. I., & Robinson, M. D. (2015). Differential analyses for RNA-seq: Transcript-  
856 level estimates improve gene-level inferences. *F1000Research*, 4.  
857 <https://doi.org/10.12688/f1000research.7563.2>
- 858 Tang, Y., Zhou, J., Hooi, S. C., Jiang, Y.-M., & Lu, G.-D. (2018). Fatty acid activation in  
859 carcinogenesis and cancer development: Essential roles of long-chain acyl-CoA synthetases.  
860 *Oncology Letters*, 16(2), 1390–1396. <https://doi.org/10.3892/ol.2018.8843>
- 861 Van Gilst, M. R., Hadjivassiliou, H., & Yamamoto, K. R. (2005). From The Cover: A *Caenorhabditis*  
862 *elegans* nutrient response system partially dependent on nuclear receptor NHR-49. *Proceedings*

- 863 *of the National Academy of Sciences*, 102(38), 13496–13501.
- 864 <https://doi.org/10.1073/pnas.0506234102>
- 865 Van Gilst, Marc R., Hadjivassiliou, H., Jolly, A., & Yamamoto, K. R. (2005). Nuclear hormone  
866 receptor NHR-49 controls fat consumption and fatty acid composition in *C. elegans*. *PLoS*  
867 *Biology*, 3(2), e53. <https://doi.org/10.1371/journal.pbio.0030053>
- 868 Verghese, E., Schocken, J., Jacob, S., Wimer, A. M., Royce, R., Nesmith, J. E., Baer, G. M., Clever, S.,  
869 McCain, E., Lakowski, B., & Wightman, B. (2011). The tailless ortholog nhr-67 functions in  
870 the development of the *C. elegans* ventral uterus. *Developmental Biology*, 356(2), 516–528.  
871 <https://doi.org/10.1016/j.ydbio.2011.06.007>
- 872 Vozdek, R., Long, Y., & Ma, D. K. (2018). The receptor tyrosine kinase HIR-1 coordinates HIF-  
873 independent responses to hypoxia and extracellular matrix injury. *Science Signaling*, 11(550).  
874 <https://doi.org/10.1126/scisignal.aat0138>
- 875 Wani, K. A., Goswamy, D., Taubert, S., Ratnappan, R., Ghazi, A., & Irazoqui, J. E. (2020). *NHR-*  
876 *49/PPAR- $\alpha$  and HLH-30/TFEB promote C. elegans host defense via a flavin-containing*  
877 *monoxygenase* [Preprint]. *Microbiology*. <https://doi.org/10.1101/2020.09.03.282087>
- 878 Zhang, H., Bosch-Marce, M., Shimoda, L. A., Tan, Y. S., Baek, J. H., Wesley, J. B., Gonzalez, F. J., &  
879 Semenza, G. L. (2008). Mitochondrial autophagy is an HIF-1-dependent adaptive metabolic  
880 response to hypoxia. *The Journal of Biological Chemistry*, 283(16), 10892–10903.  
881 <https://doi.org/10.1074/jbc.M800102200>
- 882 Zhang, J., Bakheet, R., Parhar, R. S., Huang, C.-H., Hussain, M. M., Pan, X., Siddiqui, S. S., &  
883 Hashmi, S. (2011). Regulation of Fat Storage and Reproduction by Krüppel-Like Transcription  
884 Factor KLF3 and Fat-Associated Genes in *Caenorhabditis elegans*. *Journal of Molecular*  
885 *Biology*, 411(3), 537–553. <https://doi.org/10.1016/j.jmb.2011.06.011>

886 Zhang, T., Suo, C., Zheng, C., & Zhang, H. (2019). Hypoxia and Metabolism in Metastasis. *Advances*  
887 *in Experimental Medicine and Biology*, 1136, 87–95. [https://doi.org/10.1007/978-3-030-12734-](https://doi.org/10.1007/978-3-030-12734-3_6)  
888 [3\\_6](https://doi.org/10.1007/978-3-030-12734-3_6)  
889  
890

891 **Figure Legends**

892 **Figure 1. *nhr-49* regulates *fmo-2* induction following exposure to hypoxia.**

893 (A) The graph indicates fold changes of mRNA levels (relative to unexposed wild-type) in L4  
894 wild-type, *nhr-49(nr2041)*, and *hif-1(ia4)* worms exposed to room air (21% O<sub>2</sub>) or 0.5% O<sub>2</sub> for 3 hr (n  
895 = 5). \*,\*\* p < 0.05, 0.01 (ordinary one-way ANOVA corrected for multiple comparisons using the  
896 Tukey method). (B) Representative micrographs show *Pfmo-2::gfp* and *Pfmo-2::gfp;nhr-49(nr2041)*  
897 adult worms in room air or following 4 hr exposure to 0.5% O<sub>2</sub> and 1 hr recovery in 21% O<sub>2</sub>. (C) The  
898 graph shows the quantification of intestinal GFP levels in *Pfmo-2::gfp* and *Pfmo-2::gfp;nhr-*  
899 *49(nr2041)* worms following 4 hr exposure to 0.5% O<sub>2</sub> and 1 hr recovery in 21% O<sub>2</sub> (three repeats  
900 totalling >30 individual worms per genotype). \*\*,\*\*\*\* p < 0.01, 0.0001 (ordinary one-way ANOVA  
901 corrected for multiple comparisons using the Tukey method). WT = wild-type.

902

903 **Figure 2. *nhr-49* and *hif-1* act in separate hypoxia response pathways at two stages of the**  
904 **worm life cycle.**

905 (A) The graph shows average population survival of wild-type, *nhr-49(nr2041)*, *hif-1(ia4)*, and  
906 *nhr-49(nr2041);hif-1(ia4)* worm embryos exposed for 24 hr to 0.5% O<sub>2</sub> and then allowed to recover at  
907 21% O<sub>2</sub> for 65 hr, counted as ability to reach at least the L4 stage (five repeats totalling >100 individual  
908 worms per genotype). \*\*\*\* p < 0.0001 vs. wild-type worms, ⊥ p < 0.05 vs. *nhr-49(nr2041);hif-1(ia4)*  
909 (ordinary one-way ANOVA corrected for multiple comparisons using the Tukey method). (B) The  
910 graph shows average developmental success of wild-type, *nhr-49(nr2041)*, *hif-1(ia4)*, and *nhr-*  
911 *49(nr2041);hif-1(ia4)* larval worms following 48 hr exposure to 0.5% O<sub>2</sub> from L1 stage (four repeats  
912 totalling >60 individual worms per genotype). \*\*\*, \*\*\*\* p < 0.001, 0.0001 percent L4 or older vs. wild-  
913 type worms (ordinary one-way ANOVA corrected for multiple comparisons using the Tukey method).  
914 (C) The graph shows average population survival of wild-type, *nhr-49(nr2041)*, and *hif-1(ia4)* L4  
915 worms following 24 hr exposure to 50 ppm hydrogen sulfide (three repeats totalling 60 individual



916 worms per strain). \*\*\*\* p<0.0001 vs. wild-type worms (ordinary one-way ANOVA corrected for  
917 multiple comparisons using the Tukey method). n.s. = not significant, WT = wild-type.

918

919 **Figure 3. RNA-seq reveals an *nhr-49*-dependent transcriptional program in hypoxia.**

920 **(A, B)** Venn diagrams show the overlap of sets of hypoxia (0.5% O<sub>2</sub>; vs. normoxia 21% O<sub>2</sub>)  
921 regulated genes identified in differential expression analysis comparing wild-type, *nhr-49(nr2041)*, and  
922 *hif-1(ia4)* worms. Numbers indicate the number of significantly differentially expressed genes that are  
923 upregulated (A) and downregulated (B) at least two-fold. **(C)** Heatmap of the expression levels of the  
924 83 genes which are significantly induced over two-fold in 21% O<sub>2</sub> vs. 0.5% O<sub>2</sub> in wild-type and *hif-*  
925 *1(ia4)* worms, but not in *nhr-49(nr2041)*, i.e. *nhr-49*-dependent hypoxia response genes. Genes along  
926 the y-axis are colored in each repeat based on their z-scores of the log<sub>2</sub>-transformed Counts Per Million  
927 (CPM) plus 1. Notable genes are highlighted. **(D)** Network view of the enriched functional categories  
928 among the 83 genes, which are significantly induced over two-fold in 21% O<sub>2</sub> vs. 0.5% O<sub>2</sub> in wild-type  
929 and *hif-1(ia4)* worms, but not in *nhr-49(nr2041)*. Edges represent significant gene overlap as defined  
930 by a Jaccard Coefficient larger than or equal to 25%. The dot size reflects the number of genes in each  
931 functional category; colour intensity reflects statistical significance (-log<sub>10</sub> p-value). **(E)** The graph  
932 shows the average population survival of wild-type, *nhr-49(nr2041)*, *fmo-2(ok2147)*, *acs-2(ok2457)*,  
933 and *fmo-2(ok2147);acs-2(ok2457)* worm embryos following 24 hr exposure to 0.5% O<sub>2</sub>, then allowed  
934 to recover at 21% O<sub>2</sub> for 65 hr, and counted as ability to reach at least L4 stage (five or more repeats  
935 totalling >100 individual worms per strain). \*\*\*\* p<0.0001 vs. wild-type worms. Comparison of single  
936 mutants to *fmo-2(ok2147);acs-2(ok2457)* not significant (ordinary one-way ANOVA corrected for  
937 multiple comparisons using the Tukey method). **(F)** The graph shows the average population survival  
938 of second generation wild-type and *nhr-49(nr2041)* worm embryos fed *EV*, *nhr-49*, *atg-10*, *atg-7*, *bec-*  
939 *1*, or *epg-3* RNAi, followed by 24 hr exposure to 0.5% O<sub>2</sub> and recovery at 21% O<sub>2</sub> for 65 hr, and  
940 counted as ability to reach at least L4 stage (three or more repeats totalling >100 individual worms per

941 strain). \*, \*\*, \*\*\*, \*\*\*\* p<0.05, 0.01, 0.001, 0.0001 vs. followed by worms fed *EV(RNAi)* (ordinary  
942 one-way ANOVA corrected for multiple comparisons using the Tukey method). n.s. = not significant,  
943 WT = wild-type.

944

945 **Figure 4. *nhr-49* is sufficient to promote survival in hypoxia and induce some hypoxia**  
946 **response genes.**

947 (A) The graph shows the average population survival of wild-type, *nhr-49(nr2041)*, and *nhr-*  
948 *49(et13)* worm embryos following 48 hr exposure to 0.5% O<sub>2</sub>, then allowed to recover at 21% O<sub>2</sub> for  
949 42 hr, and counted as ability to reach at least L4 stage (five repeats totalling >100 individual worms per  
950 strain). \* p<0.05 vs. wild-type worms, ⊥⊥⊥ p<0.001 vs. *nhr-49(et13)* worms (ordinary one-way  
951 ANOVA corrected for multiple comparisons using the Tukey method). (B) The graph shows average  
952 population survival of *nhr-49* tissue specific rescue worm embryos following 24 hr exposure to 0.5%  
953 O<sub>2</sub>, then allowed to recover at 21% O<sub>2</sub> for 65 hr, and counted as ability to reach at least L4 stage. *Pglp-*  
954 *19::nhr-49::gfp* for intestine, *Pcol-12::nhr-49::gfp* for hypodermis, *Prgef-1::nhr-49::gfp* for neurons,  
955 and *Pnhr-49::nhr-49::gfp* for endogenous (four or more repeats totalling >50 individual worms per  
956 strain). \* p<0.05 vs. matching non-GFP siblings. (C) The graph shows fold changes of mRNA levels  
957 (relative to wild-type) in L4 *nhr-49(et13)* worms (n = 3). \*,\*\*\* p < 0.05, 0.001 vs. wild-type worms  
958 (ordinary one-way ANOVA corrected for multiple comparisons using the Tukey method). WT = wild-  
959 type.

960

961 **Figure 5. *nhr-67* is a negative regulator of the *nhr-49*-dependent hypoxia response**  
962 **pathway.**

963 (A) The graph shows average transcript levels in counts per million (CPM) of *nhr-67* mRNA in  
964 L4 wild-type, *nhr-49(nr2041)*, and *hif-1(ia4)* worms exposed to 0.5% O<sub>2</sub> for 3 hr or kept at 21% O<sub>2</sub> (n  
965 = 3). \*\* p < 0.01 (ordinary one-way ANOVA corrected for multiple comparisons using the Tukey

966 method). **(B-E)** Representative micrographs and quantification of intestinal GFP levels in *Pfmo-2::gfp*  
967 and *Pfmo-2::gfp;nhr-49(nr2041)* (B, C) and *Pacs-2::gfp* and *Pacs-2::gfp;nhr-49(nr2041)* (D, E) adult  
968 worms fed EV RNAi or *nhr-67* RNAi following 4 hr exposure to 0.5% O<sub>2</sub> and 1 hr recovery in 21% O<sub>2</sub>  
969 (three repeats totalling >30 individual worms per strain). \*, \*\*\*, \*\*\*\* p < 0.05, 0.001, 0.0001 (ordinary  
970 one-way ANOVA corrected for multiple comparisons using the Tukey method). **(F)** Representative  
971 micrographs show *Pnhr-49::nhr-49::gfp* adult worms fed EV, *nhr-49*, or *nhr-67* RNAi following 4 hr  
972 exposure to 0.5% O<sub>2</sub> and 1 hr recovery in 21% O<sub>2</sub>. **(G)** The graph shows quantification of whole worm  
973 GFP levels in *Pnhr-49::nhr-49::gfp* worms fed EV, *nhr-49*, or *nhr-67* RNAi following 4 hr exposure to  
974 0.5% O<sub>2</sub> and 1 hr recovery in 21% O<sub>2</sub> (three or more repeats totalling >30 individual worms per strain).  
975 \*\*\*\* p < 0.0001 (ordinary one-way ANOVA corrected for multiple comparisons using the Tukey  
976 method). n.s. = not significant, WT = wild-type.

977

978 **Figure 6. *hpk-1* is a positive regulator within the *nhr-49*-dependent hypoxia response**  
979 **pathway.**

980 **(A-D)** Representative micrographs and quantification of intestinal GFP levels in *Pfmo-2::gfp*  
981 (A, B) and *Pacs-2::gfp* (C, D) adult worms fed EV, *nhr-49*, *hif-1*, or *hpk-1* RNAi following 4 hr  
982 exposure to 0.5% O<sub>2</sub> and 1 hr recovery in 21% O<sub>2</sub> (3 or more repeats totalling >30 individual worms  
983 per strain). \*\*, \*\*\*, \*\*\*\* p < 0.01, 0.001, 0.0001 vs. *EV(RNAi)* (ordinary one-way ANOVA corrected for  
984 multiple comparisons using the Tukey method). **(E)** The graph shows fold changes of mRNA levels in  
985 L4 wild-type, *nhr-49(nr2041)*, and *hpk-1(pk1393)* worms exposed to 0.5% O<sub>2</sub> for 3 hr (n = 4). \*\*, \*\*\* p  
986 < 0.01, 0.001 (ordinary one-way ANOVA corrected for multiple comparisons using the Tukey  
987 method). **(F)** The graph shows average population survival of wild-type, *nhr-49(nr2041)*, *hpk-*  
988 *1(pk1393)*, and *nhr-49(nr2041);hpk-1(pk1393)* worm embryos following 24 hr exposure to 0.5% O<sub>2</sub>,  
989 then allowed to recover at 21% O<sub>2</sub> for 65 hr, and counted as ability to reach at least L4 stage (4 repeats  
990 totalling >100 individual worms per strain). \*\*\*, \*\*\*\* p < 0.001, 0.0001 vs. wild-type worms.

991 Comparison of single mutants to *nhr-49(nr2041);hpk-1(pk1393)* not significant (ordinary one-way  
992 ANOVA corrected for multiple comparisons using the Tukey method). (G) The graph shows average  
993 population survival of wild-type, *hif-1(ia4)*, *hpk-1(pk1393)*, and *hif-1(ia4);hpk-1(pk1393)* worm  
994 embryos following 24 hr exposure to 0.5% O<sub>2</sub>, then allowed to recover at 21% O<sub>2</sub> for 65 hr, and  
995 counted as ability to reach at least L4 stage (four repeats totalling >100 individual worms per strain).  
996 \*\*\*\* p<0.0001 vs. wild-type worms, ⊥⊥⊥ p<0.001 vs. *hif-1(ia4);hpk-1(pk1393)* (ordinary one-way  
997 ANOVA corrected for multiple comparisons using the Tukey method). n.s. = not significant, WT =  
998 wild-type.

999

1000 **Figure 7. NHR-49 is induced in hypoxia in an *hpk-1*-dependent fashion.**

1001 (A) The graph shows the average fold changes of mRNA levels (relative to unexposed wild-  
1002 type wild-type) in L4 wild-type worms exposed to 0.5% O<sub>2</sub> for 3 hr (n = 4; ordinary one-way ANOVA  
1003 corrected for multiple comparisons using the Tukey method). (B) Representative micrographs show  
1004 *Pnhr-49::nhr-49::gfp* and *Pnhr-49::nhr-49::gfp;hpk-1(pk1393)* adult worms following 4 hr exposure  
1005 to 0.5% O<sub>2</sub> and 1 hr recovery in 21% O<sub>2</sub>. (C) The graph shows the quantification of whole worm GFP  
1006 levels in *Pnhr-49::nhr-49::gfp* and *Pnhr-49::nhr-49::gfp;hpk-1(pk1393)* worms following 4 hr  
1007 exposure to 0.5% O<sub>2</sub> and 1 hr recovery in 21% O<sub>2</sub> (three repeats totalling >30 individual worms per  
1008 strain). \*\*\*\* p < 0.0001 (ordinary one-way ANOVA corrected for multiple comparisons using the  
1009 Tukey method). n.s. = not significant, WT = wild-type.

1010

1011 **Figure 8. Model of the new NHR-49 hypoxia response pathway and its interaction with**  
1012 **HIF-1 signaling.**

1013 The proposed model of how NHR-49 regulates a new, *hif-1*-independent hypoxia response.  
1014 During normoxia, the transcription factor NHR-67 negatively regulates NHR-49. However, during  
1015 hypoxia, NHR-49 represses *nhr-67*, and the kinase HPK-1 positively regulates NHR-49. This allows

|016 NHR-49 to activate its downstream hypoxia response target genes, including *fmo-2*, *acs-2*, and  
|017 autophagy genes, whose induction is required for worm survival to hypoxia. (Figure created with  
|018 Biorender.com, Toronto, ON, Canada).  
|019

Figure 1

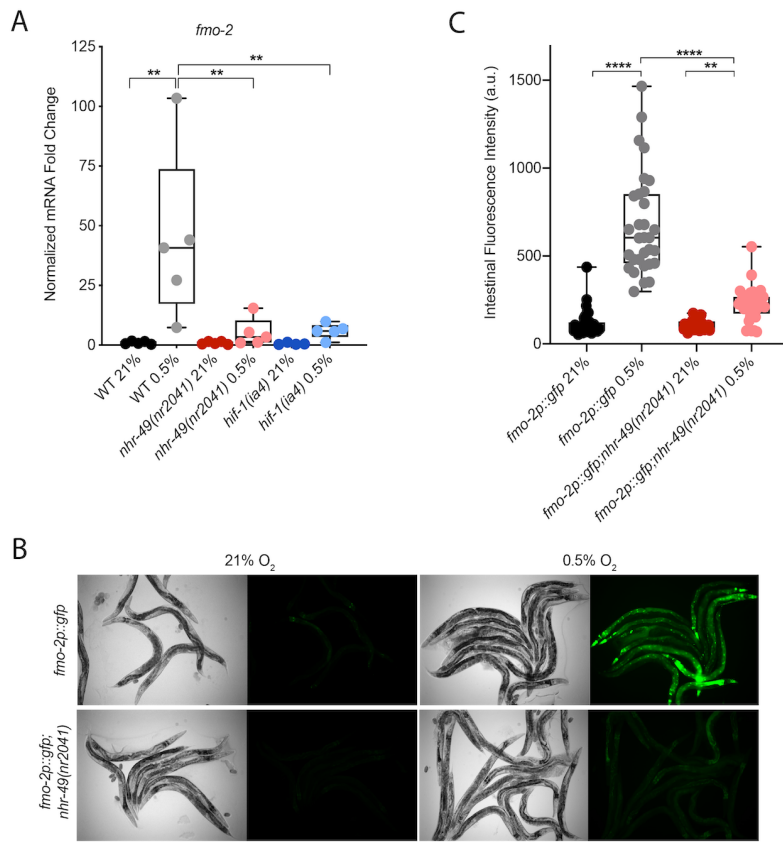

Figure 2

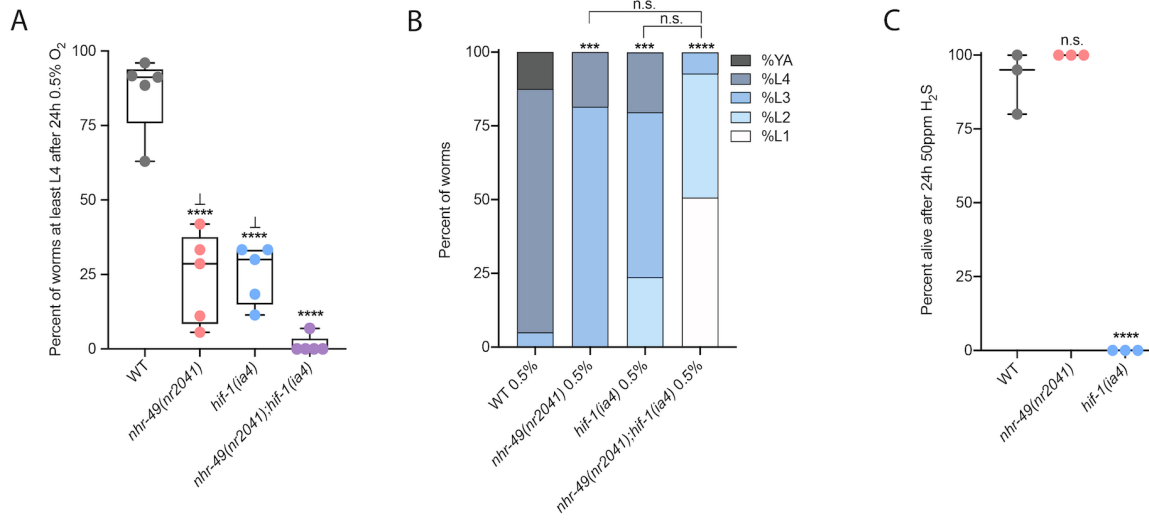

Figure 3

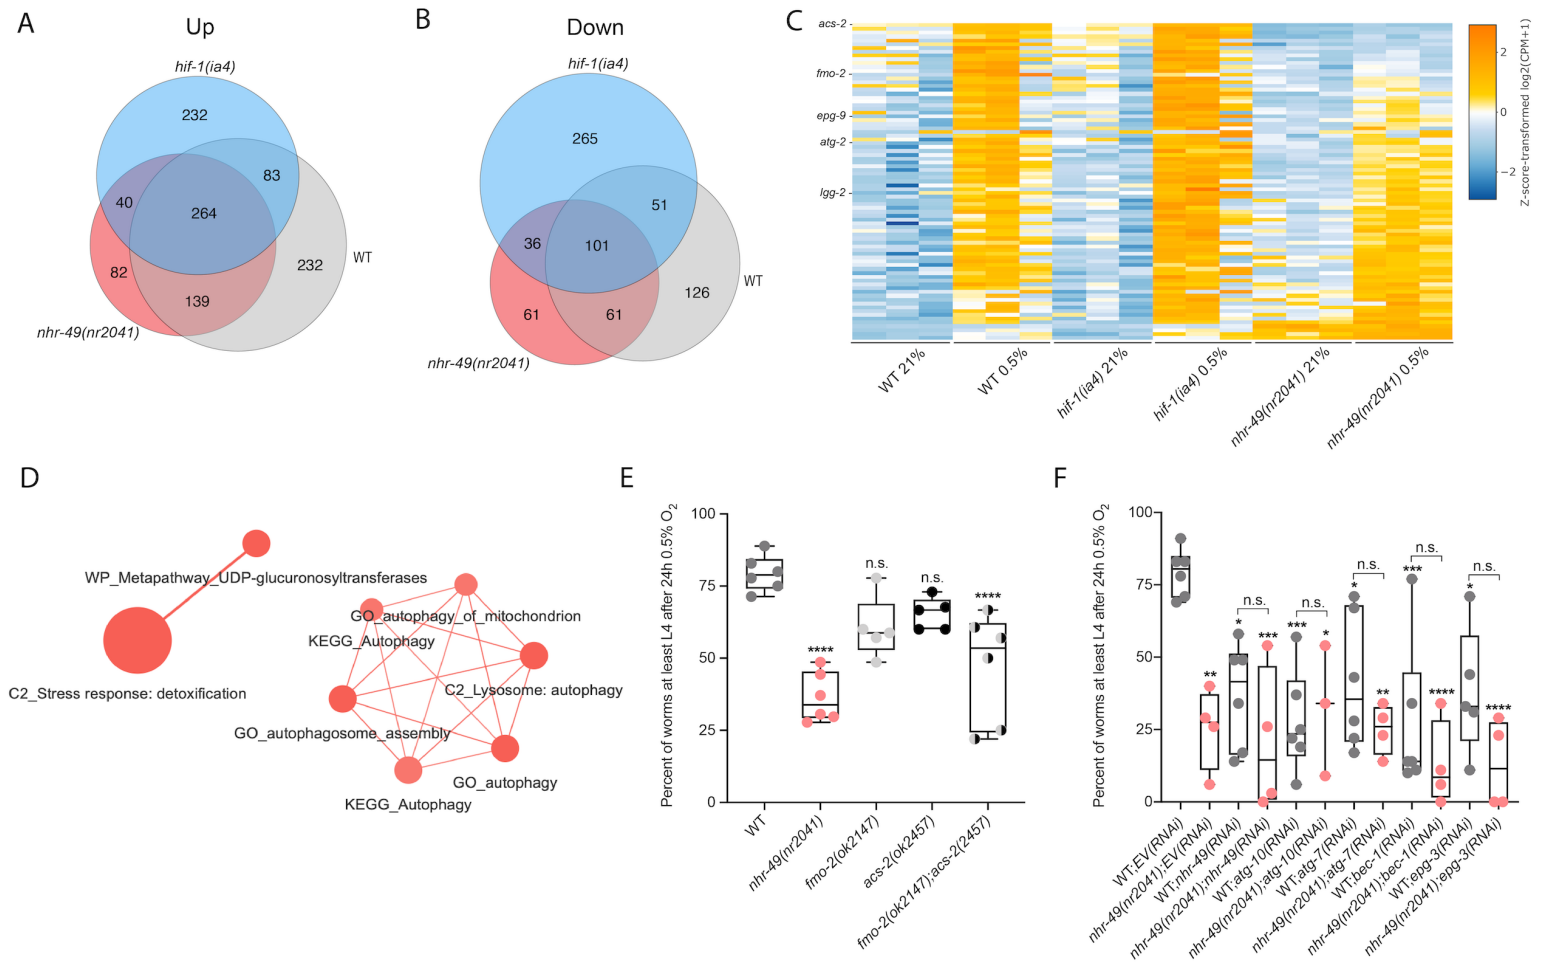



Figure 5

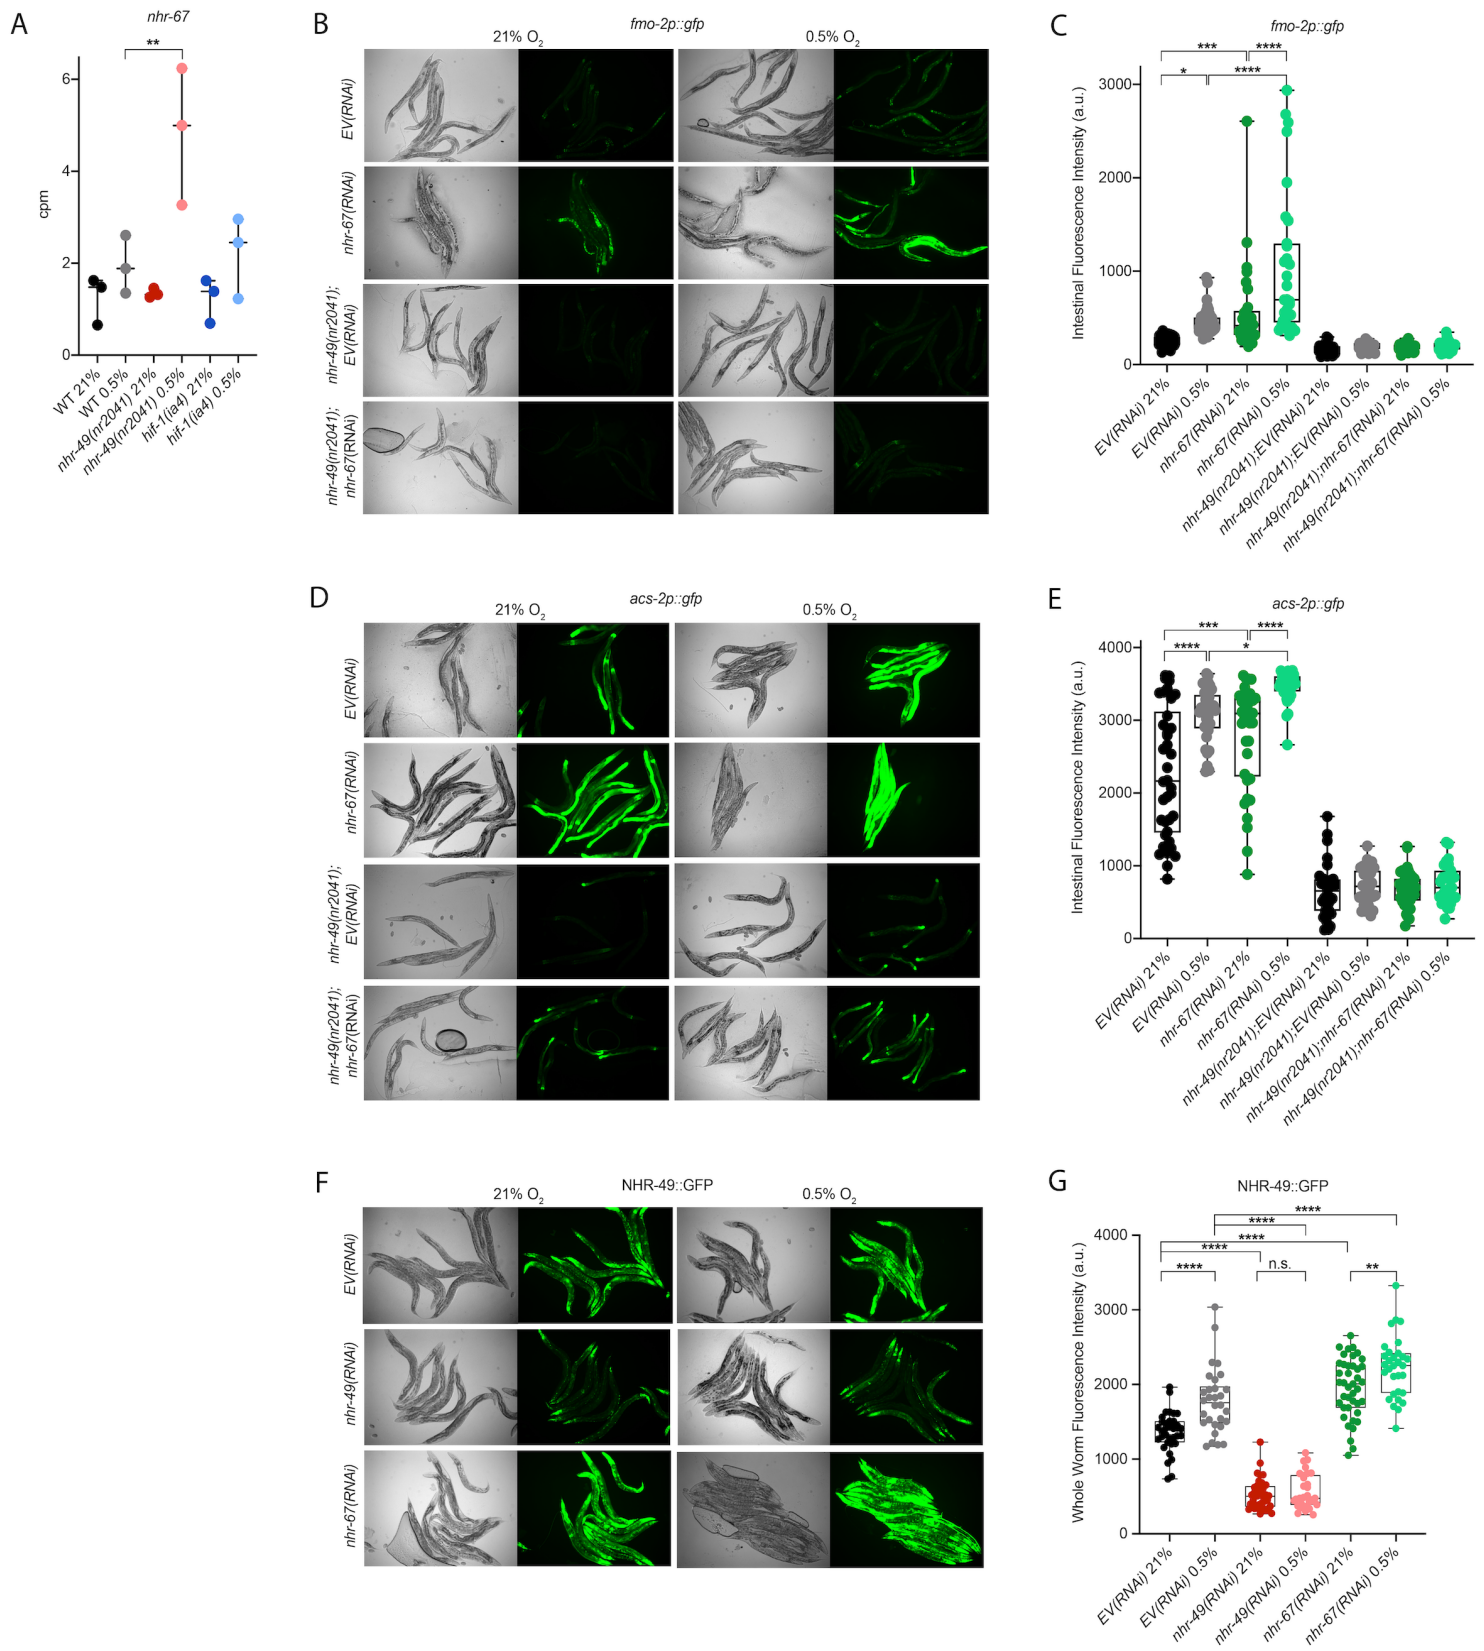

Figure 4

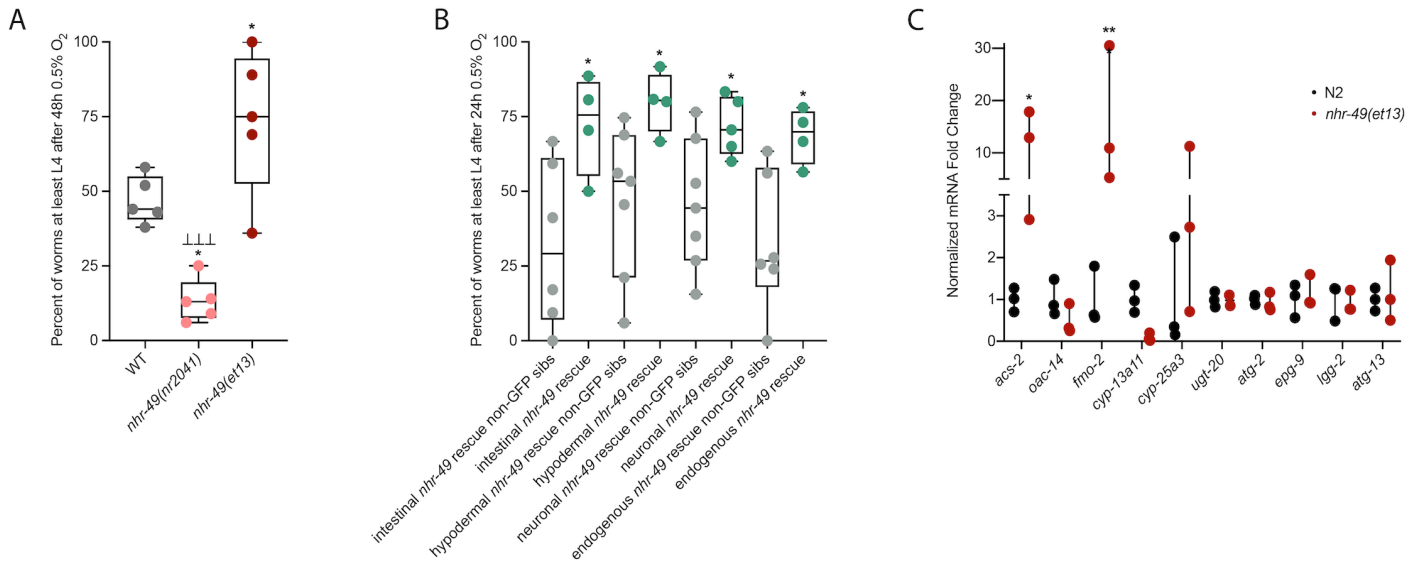

Figure 6

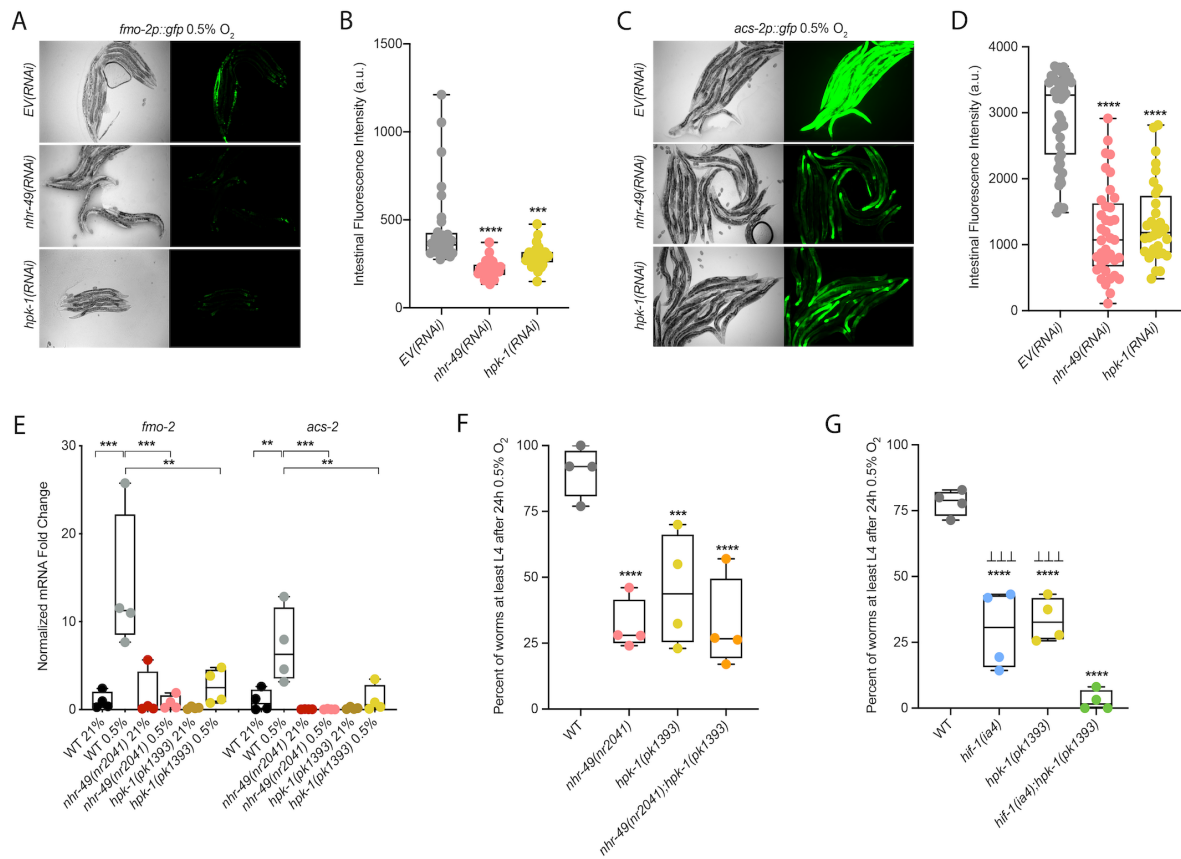

Figure 7

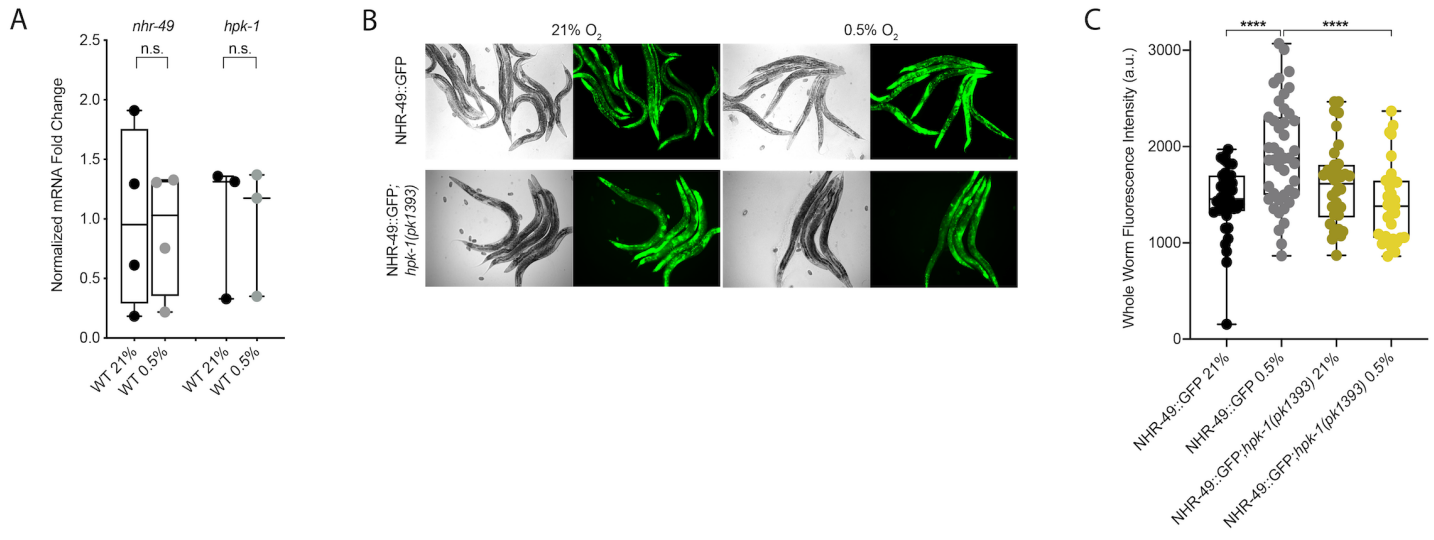

Figure 8

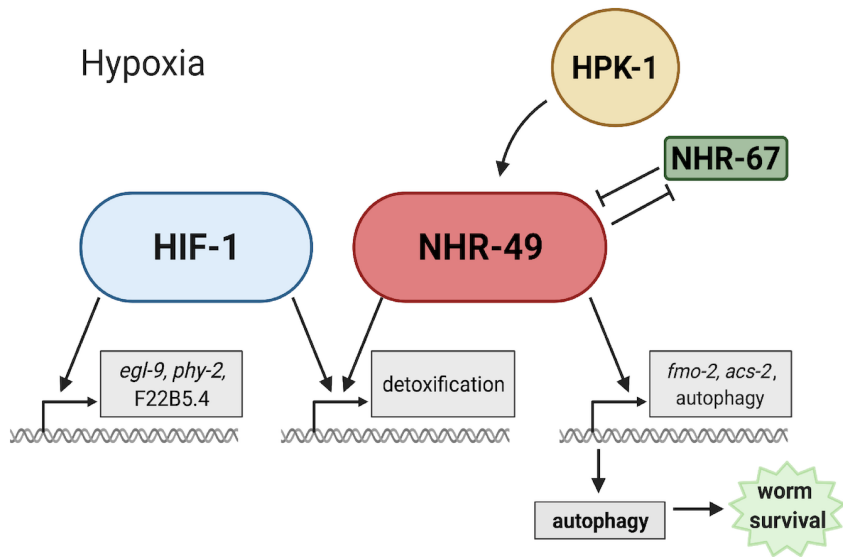

1020 **Supplementary Figures**

1021 **Supplementary Figure 1. *nhr-49* and *hif-1* mutants do not display developmental defects**  
1022 **in normoxia.**

1023 (A) The graph shows the average developmental success of wild-type, *nhr-49(nr2041)*, *hif-*  
1024 *1(ia4)*, and *nhr-49(nr2041);hif-1(ia4)* worm embryos kept in 21% O<sub>2</sub> for 65 hr, and counted as ability  
1025 to reach at least L4 stage (three repeats totalling >100 individual worms per strain). All comparisons  
1026 not significant (ordinary one-way ANOVA corrected for multiple comparisons using the Tukey  
1027 method). (B) The graph shows the average developmental success of wild-type, *nhr-49(nr2041)*, *hif-*  
1028 *1(ia4)*, and *nhr-49(nr2041);hif-1(ia4)* larval worms kept in 21% O<sub>2</sub> for 48 hr from L1 stage (four  
1029 repeats totalling >60 individual worms per strain). All comparisons not significant (ordinary one-way  
1030 ANOVA corrected for multiple comparisons using the Tukey method). WT = wild-type.

1031

1032 **Supplementary Figure 2. RNA-seq reveals discrete hypoxia responsive transcriptional**  
1033 **programs.**

1034 (A) The figure shows a Multi-Dimensional Scaling (MDS) plot of the distances between gene  
1035 expression profiles. Distances on the MDS plot correspond to the root-mean-square average of the  
1036 largest 200 log<sub>2</sub>-fold-changes between each pair of samples. (B) The graph shows average transcript  
1037 levels in counts per million (CPM) of *fmo-2* mRNA in L4 wild-type, *nhr-49(nr2041)*, and *hif-1(ia4)*  
1038 worms exposed to 0.5% O<sub>2</sub> for 3 hr or kept at 21% O<sub>2</sub> (n = 3). \*\* p < 0.01 (ordinary one-way ANOVA  
1039 corrected for multiple comparisons using the Tukey method). (C, D) Enriched WormCat (Category 2)  
1040 categories among genes that are significantly up-regulated over two-fold (C) or down-regulated over  
1041 two-fold (D) in wild-type worms in 21% O<sub>2</sub> vs. 0.5% O<sub>2</sub> are plotted by -log<sub>10</sub> p-value. (E, G)  
1042 Heatmaps of the expression levels of the (E) 139 genes from three repeats which are significantly  
1043 induced over two-fold in 21% O<sub>2</sub> vs. 0.5% O<sub>2</sub> in wild-type and *nhr-49(nr2041)* worms, but not in *hif-*  
1044 *1(ia4)*, and (G) the 264 genes from three repeats which are significantly induced over two-fold in 21%

1045 O<sub>2</sub> vs. 0.5% O<sub>2</sub> in wild-type, *hif-1(ia4)*, and *nhr-49(nr2041)* worms. Genes along the y-axis are colored  
1046 in each repeat based on their z-scores of the log<sub>2</sub>-transformed Counts Per Million (CPM) plus 1. **(F, H)**  
1047 Network views of the enriched functional categories among the 139 genes which are significantly  
1048 induced over two-fold in 21% O<sub>2</sub> vs. 0.5% O<sub>2</sub> in wild-type and *nhr-49(nr2041)* worms, but not in *hif-*  
1049 *1(ia4)* (F), and the 264 genes which are significantly induced over two-fold in 21% O<sub>2</sub> vs. 0.5% O<sub>2</sub> in  
1050 wild-type, *hif-1(ia4)*, and *nhr-49(nr2041)* worms (H). Edge represents significant gene overlap as  
1051 defined by a Jaccard Coefficient larger than or equal to 25%. Dot size reflects number of genes in each  
1052 functional category; colour intensity reflects statistical significance ( $-\log_{10}$  p-value). WT = wild-type.

1053

1054 **Supplementary Figure 3. *nhr-49* regulates *acs-2* induction following exposure to hypoxia.**

1055 **(A)** The graph shows average fold changes of mRNA levels (relative to unexposed wild-type) in  
1056 L4 wild-type, *nhr-49(nr2041)*, and *hif-1(ia4)* worms exposed to 0.5% O<sub>2</sub> for 3 hr (n = 3). \*,\*\* p < 0.05,  
1057 0.01 (ordinary one-way ANOVA corrected for multiple comparisons using the Tukey method). **(B)**  
1058 Representative micrographs show *Pacs-2::gfp* and *Pacs-2::gfp;nhr-49(nr2041)* adult worms following  
1059 4 hr exposure to 0.5% O<sub>2</sub> and 1 hr recovery in 21% O<sub>2</sub>. **(C)** The graph shows the quantification of  
1060 intestinal GFP levels in *Pacs-2::gfp* and *Pacs-2::gfp;nhr-49(nr2041)* worms following 4 hr exposure to  
1061 0.5% O<sub>2</sub> and 1 hr recovery in 21% O<sub>2</sub> (three repeats totalling >30 individual worms per strain). \*\*\*\* p  
1062 <0.0001 (ordinary one-way ANOVA corrected for multiple comparisons using the Tukey method). n.s.  
1063 = not significant, WT = wild-type.

1064

1065 **Supplementary Figure 4. Mutants of downstream transcriptional targets of *nhr-49* in**  
1066 **hypoxia do not display functional defects in normoxia.**

1067 **(A)** The graph shows the average population survival of wild-type, *nhr-49(nr2041)*, *fmo-*  
1068 *2(ok2147)*, *acs-2(ok2457)*, and *fmo-2(ok2147);acs-2(ok2457)* worm embryos kept in 21% O<sub>2</sub> for 65 hr,  
1069 and counted as ability to reach at least L4 stage (three repeats totalling >100 individual worms per

1070 strain). All comparisons not significant (ordinary one-way ANOVA corrected for multiple comparisons  
1071 using the Tukey method). **(B)** The graph shows the average population survival of second generation  
1072 wild-type and *nhr-49(nr2041)* worm embryos fed EV, *nhr-49*, *atg-10*, *atg-7*, *bec-1*, or *epg-3* RNAi  
1073 kept in 21% O<sub>2</sub> for 65 hr, and counted as ability to reach at least L4 stage (three repeats totalling >100  
1074 individual worms per strain). All comparisons not significant (ordinary one-way ANOVA corrected for  
1075 multiple comparisons using the Tukey method). WT = wild-type.

1076

1077 **Supplementary Figure 5. *nhr-67* is functionally required for survival in hypoxia.**

1078 **(A)** The graph shows average fold changes of mRNA levels (relative to wild-type) in L4 wild-  
1079 type and *nhr-49(et13)* worms (n = 3; ordinary one-way ANOVA corrected for multiple comparisons  
1080 using the Tukey method). **(B-C)** Representative micrographs (B) and quantification (C) of intestinal  
1081 GFP levels in *Pfmo-2::gfp;nhr-49(et13)* adult worms fed EV or *nhr-67* RNAi kept in 21% O<sub>2</sub> (three  
1082 repeats totalling >30 individual worms per strain). \*\* p < 0.01 (ordinary one-way ANOVA corrected  
1083 for multiple comparisons using the Tukey method). **(D)** The graph shows average population survival  
1084 of second generation wild-type worm embryos fed EV, *nhr-49*, or *nhr-67* RNAi following 24 hr  
1085 exposure to 0.5% O<sub>2</sub>, then allowed to recover at 21% O<sub>2</sub> for 65 hr, and counted as ability to reach at  
1086 least L4 stage (four repeats totalling >100 individual worms per strain). \*, \*\* p < 0.05, 0.01 vs.  
1087 *EV(RNAi)* worms (ordinary one-way ANOVA corrected for multiple comparisons using the Tukey  
1088 method). **(E)** The graph shows the average population survival of second generation wild-type worm  
1089 embryos fed EV, *nhr-49*, or *nhr-67* RNAi kept in 21% O<sub>2</sub> for 65 hr, and counted as ability to reach at  
1090 least L4 stage (four repeats totalling >100 individual worms per strain). All comparisons not significant  
1091 (ordinary one-way ANOVA corrected for multiple comparisons using the Tukey method). n.s. = not  
1092 significant, WT = wild-type.

1093

1094 **Supplementary Figure 6. *hpk-1* mutants do not display functional defects in normoxia.**



l095           **(A, B)** Representative micrographs (A) and quantification (B) of intestinal GFP levels in *Pfmo-*  
l096 *2::gfp;nhr-49(et13)* adult worms fed EV, *nhr-49*, *hif-1*, or *hpk-1* RNAi kept in 21% O<sub>2</sub> (three or more  
l097 repeats totalling >30 individual worms per strain). \*\*\*\* p < 0.0001 vs. *EV(RNAi)* (ordinary one-way  
l098 ANOVA corrected for multiple comparisons using the Tukey method). **(C)** The graph shows average  
l099 population survival of wild-type, *nhr-49(nr2041)*, *hpk-1(pk1393)*, and *nhr-49(nr2041);hpk-1(pk1393)*  
l100 worm embryos kept in 21% O<sub>2</sub> for 65 hr, and counted as ability to reach at least L4 stage (four repeats  
l101 totalling >100 individual worms per strain). All comparisons not significant (ordinary one-way  
l102 ANOVA corrected for multiple comparisons using the Tukey method). **(D)** The graph shows average  
l103 population survival of wild-type, *hif-1(ia4)*, *hpk-1(pk1393)*, and *hif-1(ia4);hpk-1(pk1393)* worm  
l104 embryos kept in 21% O<sub>2</sub> for 65 hr, and counted as ability to reach at least L4 stage (four repeats  
l105 totalling >60 individual worms per strain). All comparisons not significant (ordinary one-way ANOVA  
l106 corrected for multiple comparisons using the Tukey method). n.s. = not significant, WT = wild-type.

l107

l108           **Supplementary Figure 7. *hpk-1* is post-transcriptionally regulated in hypoxia.**

l109           **(A)** Representative micrographs show *Phpk-1::gfp* adult worms in 21% O<sub>2</sub> or following 4 hr  
l110 exposure to 0.5% O<sub>2</sub> and 1 hr recovery in 21% O<sub>2</sub>. **(B)** Quantification of whole worm GFP levels in  
l111 *Phpk-1::gfp* worms following 4 hr exposure to 0.5% O<sub>2</sub> and 1 hr recovery in 21% O<sub>2</sub> or kept at 21% O<sub>2</sub>  
l112 (four repeats totalling >30 individual worms per strain; ordinary one-way ANOVA corrected for  
l113 multiple comparisons using the Tukey method). n.s. = not significant.

l114

Supplementary Figure 1

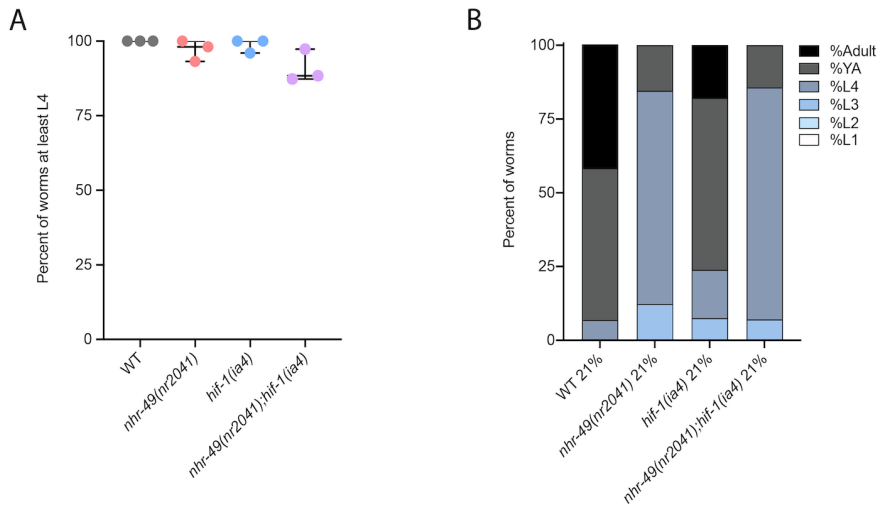

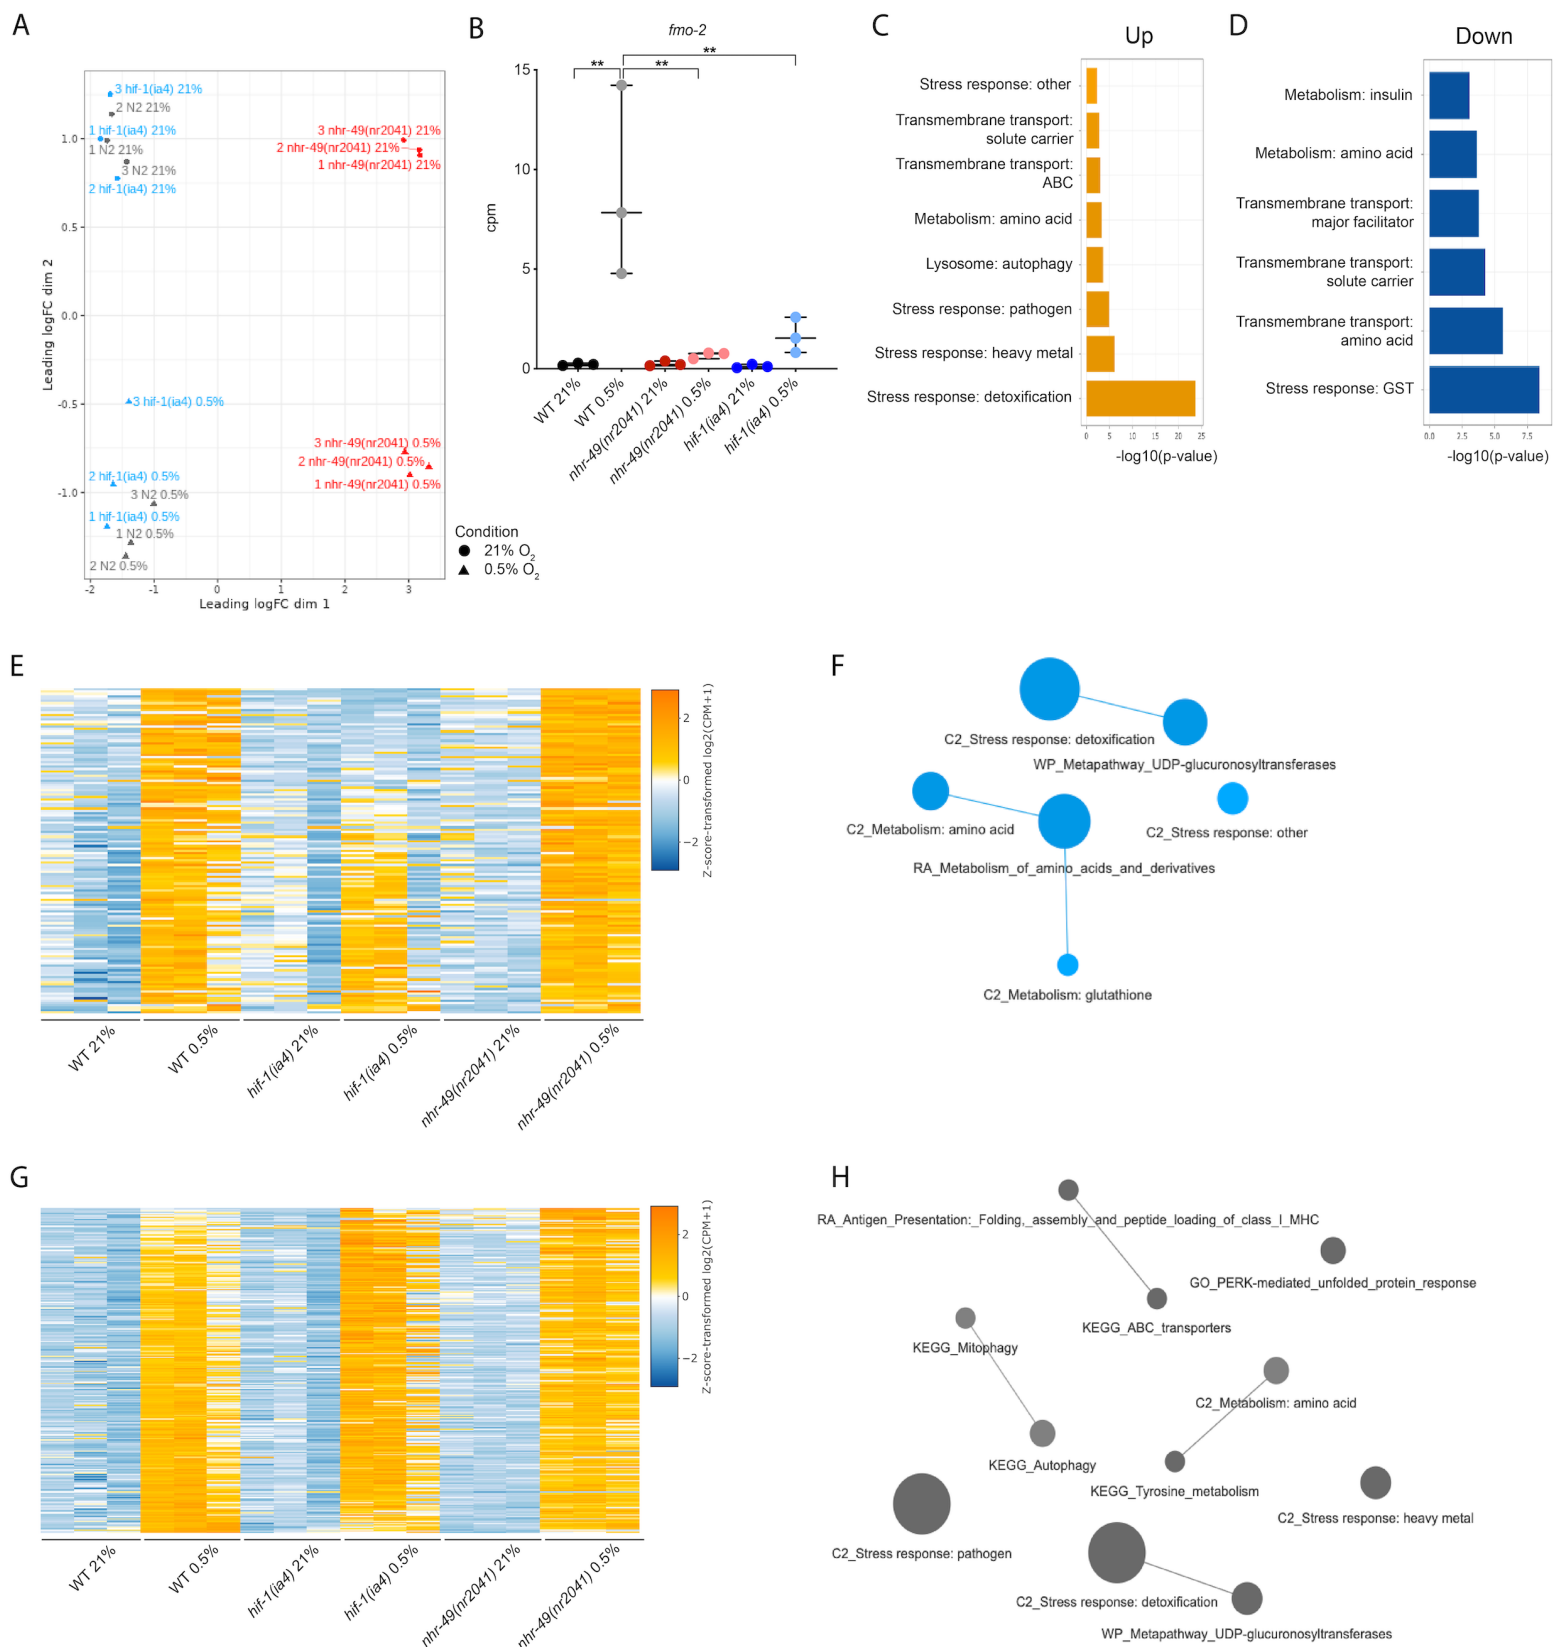



Supplementary Figure 4

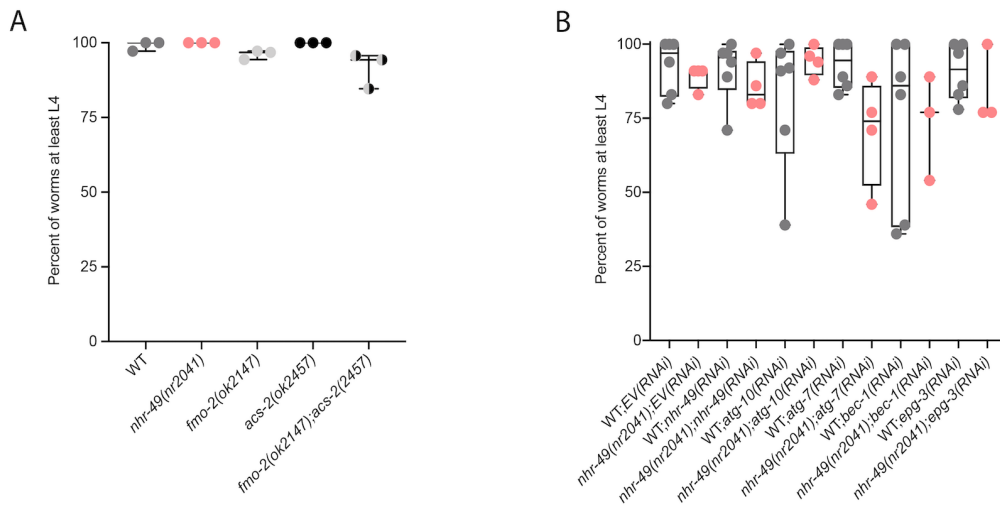

Supplementary Figure 5

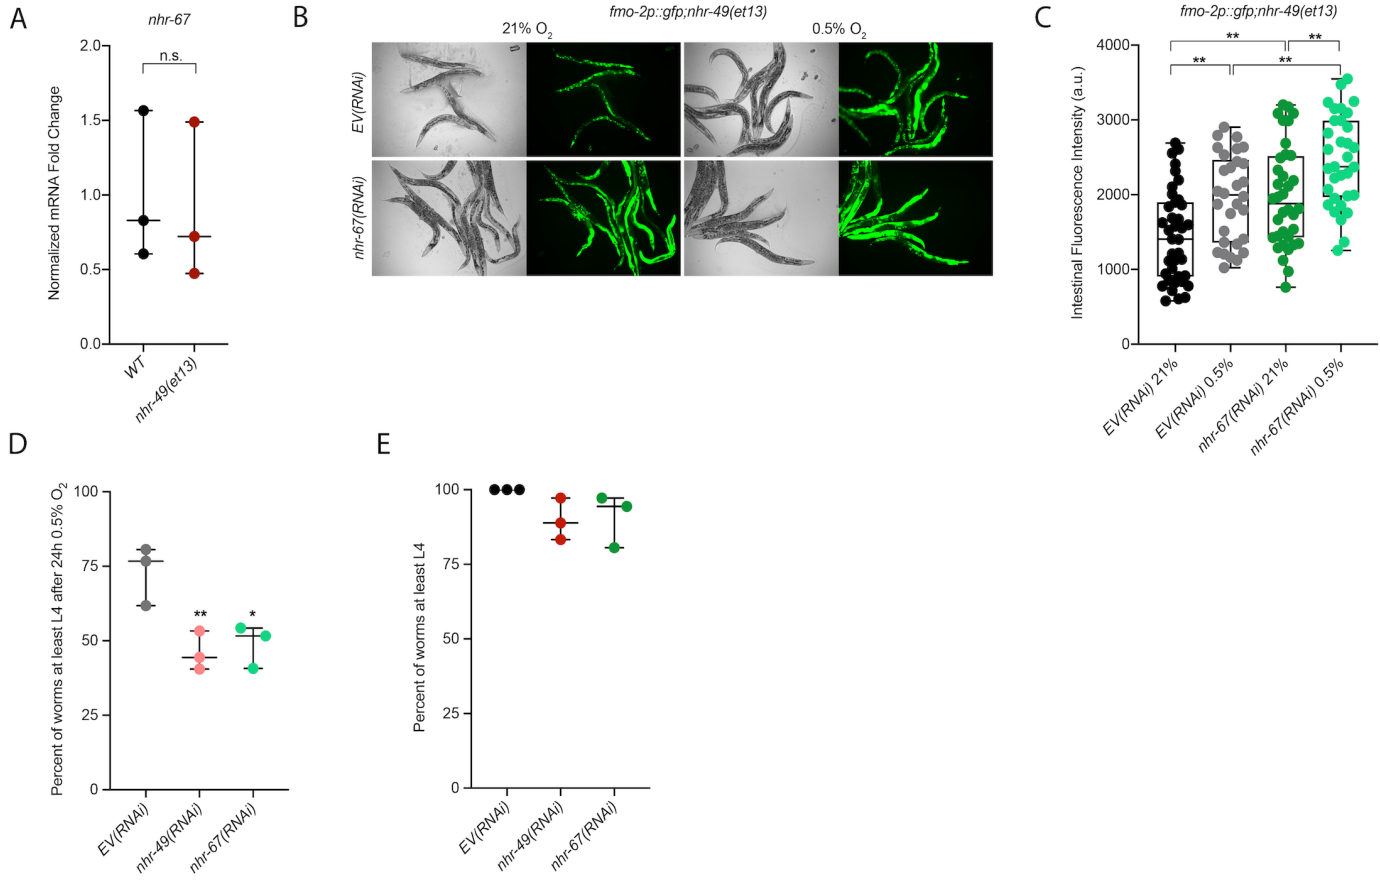

Supplementary Figure 6

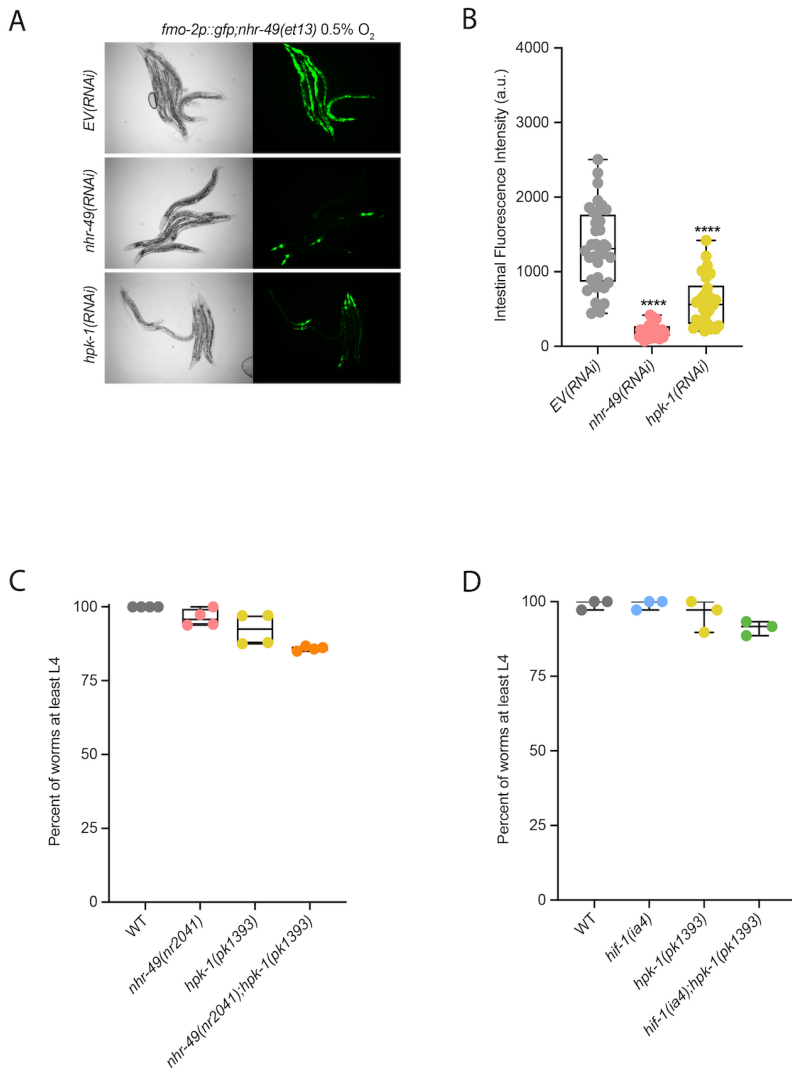

Supplementary Figure 7

A

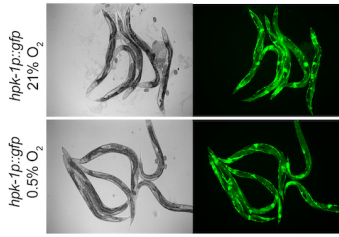

B

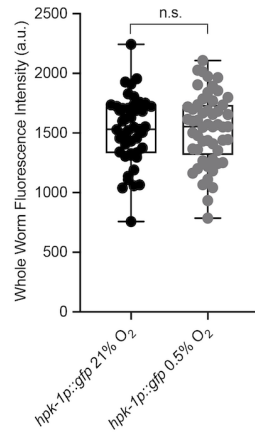



1115 **Supplementary Tables**

1116 **Supplementary Table 1. Statistical comparison of each genotype's ability to reach at least L4**

1117 **following 24 hr exposure to 0.5% O<sub>2</sub> as embryo and then allowed to recover at 21% O<sub>2</sub> for 65 hr,**

1118 **compared to worm embryos kept in 21% O<sub>2</sub> for 65 hr.**

| 0.5% O <sub>2</sub> Figure | 21% O <sub>2</sub> Figure | Genotype                           | p-value     |
|----------------------------|---------------------------|------------------------------------|-------------|
| Figure 2A                  | Supplementary Figure 1A   | WT                                 | 0.4943      |
| Figure 2A                  | Supplementary Figure 1A   | <i>nhr-49(nr2041)</i>              | <0.0001**** |
| Figure 2A                  | Supplementary Figure 1A   | <i>hif-1(ia4)</i>                  | <0.0001**** |
| Figure 2A                  | Supplementary Figure 1A   | <i>nhr-49(nr2041);hif-1(ia4)</i>   | <0.0001**** |
| Figure 3D                  | Supplementary Figure 4A   | WT                                 | 0.1403      |
| Figure 3D                  | Supplementary Figure 4A   | <i>nhr-49(nr2041)</i>              | <0.0001**** |
| Figure 3D                  | Supplementary Figure 4A   | <i>fmo-2(ok2147)</i>               | 0.0005***   |
| Figure 3D                  | Supplementary Figure 4A   | <i>acs-2(ok2457)</i>               | 0.0008***   |
| Figure 3D                  | Supplementary Figure 4A   | <i>fmo-2(ok2147);acs-2(ok2157)</i> | <0.0001**** |
| Figure 3E                  | Supplementary Figure 4B   | WT; <i>EV(RNAi)</i>                | 0.9995      |
| Figure 3E                  | Supplementary Figure 4B   | <i>nhr-49(nr2041);EV(RNAi)</i>     | 0.0003***   |
| Figure 3E                  | Supplementary Figure 4B   | WT; <i>nhr-49(RNAi)</i>            | 0.0001***   |
| Figure 3E                  | Supplementary Figure 4B   | <i>nhr-49(nr2041);nhr-49(RNAi)</i> | 0.0002***   |
| Figure 3E                  | Supplementary Figure 4B   | WT; <i>atg-10(RNAi)</i>            | 0.0001***   |
| Figure 3E                  | Supplementary Figure 4B   | <i>nhr-49(nr2041);atg-10(RNAi)</i> | 0.0021**    |
| Figure 3E                  | Supplementary Figure 4B   | WT; <i>atg-7(RNAi)</i>             | 0.0003***   |
| Figure 3E                  | Supplementary Figure 4B   | <i>nhr-49(nr2041);atg-7(RNAi)</i>  | 0.0534      |
| Figure 3E                  | Supplementary Figure 4B   | WT; <i>bec-1(RNAi)</i>             | 0.0015**    |
| Figure 3E                  | Supplementary Figure 4B   | <i>nhr-49(nr2041);bec-1(RNAi)</i>  | 0.0033**    |

|                         |                         |                                     |             |
|-------------------------|-------------------------|-------------------------------------|-------------|
| Figure 3E               | Supplementary Figure 4B | WT; <i>epg-3(RNAi)</i>              | 0.0006****  |
| Figure 3E               | Supplementary Figure 4B | <i>nhr-49(nr2041);epg-3(RNAi)</i>   | 0.0001****  |
| Supplementary Figure 5D | Supplementary Figure 5E | <i>EV(RNAi)</i>                     | 0.0072**    |
| Supplementary Figure 5D | Supplementary Figure 5E | <i>nhr-49(RNAi)</i>                 | 0.0001****  |
| Supplementary Figure 5D | Supplementary Figure 5E | <i>nhr-67(RNAi)</i>                 | 0.0002****  |
| Figure 6F               | Supplementary Figure 6C | WT                                  | 0.9119      |
| Figure 6F               | Supplementary Figure 6C | <i>nhr-49(nr2041)</i>               | <0.0001**** |
| Figure 6F               | Supplementary Figure 6C | <i>hpk-1(pk1393)</i>                | <0.0001**** |
| Figure 6F               | Supplementary Figure 6C | <i>nhr-49(nr2041);hpk-1(pk1393)</i> | <0.0001**** |
| Figure 6G               | Supplementary Figure 6D | WT                                  | 0.0223*     |
| Figure 6G               | Supplementary Figure 6D | <i>hif-1(ia4)</i>                   | <0.0001**** |
| Figure 6G               | Supplementary Figure 6D | <i>hpk-1(pk1393)</i>                | <0.0001**** |
| Figure 6G               | Supplementary Figure 6D | <i>hif-1(ia4);hpk-1(pk1393)</i>     | <0.0001**** |

1119 All p-values are derived using ordinary one-way ANOVA corrected for multiple comparisons using the

1120 Tukey method. \*p<0.05, \*\*p<0.01, \*\*\*p<0.001, and \*\*\*\*p<0.0001. WT = wild-type.

1121

1122 **Supplementary Table 2. Statistical comparison of each genotype's ability to reach at least L4**

1123 **stage from L1 stage following 48 hr exposure to 0.5% O<sub>2</sub> as embryos, compared to worms kept in**

1124 **21% O<sub>2</sub> for 48 hr.**

| 0.5% O <sub>2</sub> Figure | 21% O <sub>2</sub> Figure | Genotype                         | p-value     |
|----------------------------|---------------------------|----------------------------------|-------------|
| Figure 2B                  | Supplementary Figure 1B   | WT                               | >0.9999     |
| Figure 2B                  | Supplementary Figure 1B   | <i>nhr-49(nr2041)</i>            | 0.0028**    |
| Figure 2B                  | Supplementary Figure 1B   | <i>hif-1(ia4)</i>                | 0.0021**    |
| Figure 2B                  | Supplementary Figure 1B   | <i>nhr-49(nr2041);hif-1(ia4)</i> | <0.0001**** |

l125 All p-values are derived using ordinary one-way ANOVA corrected for multiple comparisons using the  
l126 Tukey method. \*\*p<0.01 and \*\*\*\*p<0.0001. WT = wild-type.

l127

l128 **Supplementary Table 3. List of the 83 genes upregulated more than two-fold in 21% O<sub>2</sub> vs. 0.5%**  
l129 **O<sub>2</sub> in wild-type and *hif-1(ia4)* worms, but not in *nhr-49(nr2041)* worms, i.e. *nhr-49*-dependent,**  
l130 ***hif-1*-independent genes.**

|          |            |           |         |          |          |           |
|----------|------------|-----------|---------|----------|----------|-----------|
| ABHD-5.1 | C42D4.1    | CYP-37B1* | FAAH-2  | MNK-1    | R10D12.6 | TBC-14    |
| ACS-2    | C49G7.12   | CYP-43A1* | FBXA-98 | NHL-3    | SIAH-1   | UGT-2*    |
| AKT-2    | C49G7.7    | EEED8.2   | FBXA-99 | NHR-131  | SRH-2    | UGT-20*   |
| ATG-2    | C50F7.5    | EPG-9     | FMO-2   | NHR-238  | SRR-6    | UGT-51*   |
| B0228.6  | CBP-3      | F13E9.15  | GBA-2   | NHR-65   | SRT-39   | VEM-1     |
| B0403.3  | CUP-16     | F16B12.4  | ICL-1   | NHR-88   | SRW-86   | W09G12.7  |
| C01B4.7  | CYP-13A11* | F16C3.2   | K09D9.1 | NUMR-2   | SYX-2    | Y19D10A.4 |
| C06E4.6  | CYP-13A5*  | F20B6.7   | K09E9.1 | OAC-14   | T04H1.2  | Y38C1AA.6 |
| C18B12.4 | CYP-13A6*  | F22F7.4   | LGC-1   | OAC-6    | T16G1.4  | Y43F8C.3  |
| C25F9.11 | CYP-25A3*  | F35E8.2   | LGG-2   | PALS-14  | T21B4.21 | Y77E11A.2 |
| C33A11.2 | CYP-34A9*  | F43G6.8   | M01A8.1 | R03H10.6 | T22C8.6  | ZIP-5     |
| C33A12.3 | CYP-35A1*  | F59C6.16  | MFB-1   | R09D1.12 | T24E12.5 |           |

l131 \* genes involved in detoxification response

l132

l133 **Supplementary Table 4. List of 139 genes upregulated more than two-fold in 21% O<sub>2</sub> vs. 0.5% O<sub>2</sub>**  
l134 **in wild-type and *nhr-49(nr2041)* worms, but not in *hif-1(ia4)* worms, i.e. *hif-1*-dependent, *nhr-49*-**  
l135 **independent genes.**

|          |           |           |         |         |          |            |
|----------|-----------|-----------|---------|---------|----------|------------|
| ACS-12   | C52E2.5   | F07C3.9   | FBXA-50 | MMAA-1  | SQRD-1   | UGT-5*     |
| B0507.6  | C56E6.2   | F13H8.11  | FMO-4   | NAS-28  | SRD-35   | UGT-50*    |
| BATH-36  | CBP-2     | F16H6.10  | FRM-10  | NHR-161 | SRH-283  | W07A12.4   |
| C06G3.6  | CEEH-1    | F17C11.11 | GBH-2   | NHR-173 | SRX-12   | Y102A11A.9 |
| C08B6.2  | CHIL-13   | F22B3.7   | GCL-1   | NHR-195 | SRX-125  | Y105C5B.25 |
| C10C5.5  | CLEC-144  | F22B5.4   | GLB-1   | NHR-210 | SRX-21   | Y116A8C.25 |
| C14B9.3  | CLEC-222  | F25E5.4   | GLB-15  | NHR-42  | T04A11.1 | Y17G7B.8   |
| C15B12.8 | CLEC-223  | F29C6.1   | HGO-1   | NHR-59  | T07G12.5 | Y32B12C.1  |
| C18H9.5  | COMT-4    | F35E12.9  | K04C1.3 | NLG-1   | T20D4.3  | Y40H7A.11  |
| C25F9.5  | CYP-13A3* | F37H8.2   | K05C4.9 | OAC-31  | T24A6.7  | Y43F8B.13  |

|          |           |           |           |          |          |            |
|----------|-----------|-----------|-----------|----------|----------|------------|
| C31H5.5  | CYP-14A2* | F42C5.4   | K08B4.7   | OAC-54   | T28F3.5  | Y43F8B.15  |
| C32D5.12 | D1054.18  | F42G2.2   | K11D12.13 | OAC-7    | T28H10.1 | Y43F8B.23  |
| C32E8.9  | DDO-1     | F45D11.14 | K11G9.1   | PCK-1    | T28H10.3 | Y47H10A.5  |
| C33D9.6  | DEL-5     | F47H4.2   | KMO-1     | PCP-2    | TBC-6    | Y4C6B.4    |
| C34D1.4  | DH11.2    | F53C3.4   | LINC-72   | PGP-7    | TPRA-1   | Y53G8B.2   |
| C34D10.2 | E02C12.10 | F56D2.5   | M01H9.2   | PHY-2    | TPS-2    | Y57A10A.14 |
| C37C3.10 | ECH-9     | F57B9.1   | M03A1.3   | R05G6.10 | TWK-31   | Y5H2B.1    |
| C44C1.6  | EFK-1     | FBXA-188  | MADF-10   | R07E4.1  | UGT-17*  | ZK228.4    |
| C44E12.1 | EGL-9     | FBXA-25   | MATH-27   | R08D7.7  | UGT-24*  | ZK550.6    |
| C49C3.15 | ETHE-1    | FBXA-26   | MCE-1     | SKR-5    | UGT-4*   |            |

1136 \* genes involved in detoxification response

1137

1138 **Supplementary Table 5. List of 264 genes upregulated more than two-fold in 21% O<sub>2</sub> vs. 0.5% O<sub>2</sub>**

1139 **via RNA-seq in wild-type, *nhr-49(nr2041)*, and *hif-1(ia4)*.**

|           |           |          |          |         |          |           |
|-----------|-----------|----------|----------|---------|----------|-----------|
| AAKG-4    | CATP-3    | F21D12.3 | FBXA-82  | M01H9.3 | SLC-17.4 | UGT-19*   |
| ARRD-11   | CDR-2     | F22H10.2 | FBXA-91  | M163.1  | SLC-36.5 | UGT-33*   |
| ARRD-24   | CHIL-18   | F25B3.5  | FBXA-92  | M60.7   | SODH-1   | UGT-54*   |
| ARRD-8    | CKR-2     | F26F12.3 | FBXL-1   | MAI-1   | SQST-1   | W04C9.8   |
| B0205.13  | CNC-2     | F27D9.2  | FIPR-22  | MTL-1   | SRD-27   | W05H9.1   |
| B0205.14  | CNC-4     | F28H1.1  | FIPR-24  | NEP-26  | SRH-48   | Y15E3A.5  |
| B0310.3   | CNG-1     | F28H6.8  | FIPR-26  | NHR-103 | SRI-36   | Y34F4.4   |
| B0462.5   | COEL-1    | F33H12.7 | FKH-7    | NHR-107 | SRI-39   | Y34F4.7   |
| BEST-5    | COMT-5    | F34H10.3 | FTN-1    | NHR-115 | SRM-3    | Y37A1B.5  |
| BIGR-1    | CYP-13A8* | F37A8.5  | GEM-4    | NHR-126 | SRP-8    | Y38H6C.9  |
| C02F5.12  | CYP-14A1* | F40F12.9 | GLO-3    | NHR-132 | STO-1    | Y39A3A.4  |
| C04A11.5  | CYP-14A4* | F41E6.5  | GPA-1    | NHR-18  | STR-31   | Y42G9A.1  |
| C04C11.25 | CYP-14A5  | F43C1.7  | H28G03.1 | NHR-211 | SWT-1    | Y43F8B.14 |
| C06B3.6   | CYP-32B1* | F43C11.7 | HAF-7    | NHR-212 | T05H4.15 | Y43F8B.9  |
| C06B3.7   | CYP-33C7  | F43H9.4  | HIL-1    | NHR-226 | T08A9.13 | Y44A6C.1  |
| C06E1.11  | CYP-33C8* | F45D3.4  | HPD-1    | NHR-228 | T09F5.12 | Y45F10D.6 |
| C08E8.4   | D1086.5   | F45E1.5  | HRG-1    | NHR-230 | T10C6.15 | Y46G5A.36 |
| C08F11.13 | DAAO-1    | F46A8.13 | HRG-2    | NHR-57  | T10G3.1  | Y47G6A.5  |
| C10C5.2   | DC2.5     | F47B10.9 | HSP-12.3 | NHR-79  | T10H9.8  | Y47H10A.3 |
| C11G10.1  | DCT-1     | F47B8.3  | HSP-70   | NHR-90  | T12A7.6  | Y54G11A.7 |
| C18A11.1  | DCT-7     | F47B8.4  | IRG-2    | NHR-99  | T12D8.5  | Y54G2A.11 |
| C23H4.2   | DCT-8     | F53A9.7  | IST-1    | NIPI-3  | T16G1.5  | Y54G2A.36 |
| C23H4.6   | DOD-3     | F53B2.8  | K01C8.1  | NNT-1   | T19C4.5  | Y54G2A.52 |
| C24B5.4   | E03H4.8   | F53C3.6  | K01F9.2  | PALS-34 | T20D4.7  | Y56A3A.33 |

|          |           |           |          |          |         |           |
|----------|-----------|-----------|----------|----------|---------|-----------|
| C25F9.12 | E04F6.6   | F54B8.4   | K02D7.1  | PALS-6   | T24C4.4 | Y58A7A.3  |
| C28G1.6  | EGAP1.1   | F55C12.19 | K05B2.4  | PARG-2   | T27F6.8 | Y58A7A.4  |
| C29F7.2  | F08G12.5  | F56C4.4   | K06A9.2  | PCS-1    | T28B8.1 | Y58A7A.5  |
| C31H2.4  | F09F7.6   | F56D6.8   | K06G5.3  | PEK-1    | T28F4.4 | Y6E2A.4   |
| C33D9.13 | F10E9.12  | F57B9.3   | K08D8.12 | PGP-3    | T28F4.5 | Y6G8.2    |
| C35A5.6  | F13C5.1   | F58G6.9   | K08D9.4  | PGP-9    | TLI-1   | Y71G12B.2 |
| C36B1.6  | F13D11.3  | F59B10.4  | K09C8.7  | PITR-5   | TOS-1   | ZC239.14  |
| C37A5.3  | F14F9.2   | F59E11.7  | K10G4.3  | PTR-22   | TSP-1   | ZC395.5   |
| C44H9.5  | F14F9.3   | FBXA-105  | K10G6.9  | R06B9.5  | TTR-23  | ZC443.3   |
| C46C2.2  | F14F9.4   | FBXA-163  | K12H6.6  | R06C1.6  | TTR-37  | ZC443.4   |
| C49G7.10 | F15A8.6   | FBXA-189  | KGB-2    | R08F11.4 | TTS-1   | ZIG-7     |
| C54F6.18 | F15E6.3   | FBXA-24   | KREG-1   | R102.1   | UBC-8   | ZK836.3   |
| C54G10.1 | F17C11.13 | FBXA-66   | LINC-37  | R186.1   | UGT-13* |           |
| CAH-4    | F18G5.6   | FBXA-80   | M01B2.13 | SCL-2    | UGT-18* |           |

1140 \* genes involved in detoxification response

1141

1142 **Supplementary Table 6. Worm strains used in this study.**

| Strain | Genotype                                                                    | Reference                        |
|--------|-----------------------------------------------------------------------------|----------------------------------|
| N2     | Wild-type                                                                   | (Brenner, 1974)                  |
| STE68  | <i>nhr-49(nr2041) I</i>                                                     | (Marc R. Van Gilst et al., 2005) |
| VE40   | <i>eavEx20[Pfmo-2::<i>gfp</i> + <i>rol-6(su1006)</i>]</i>                   | (Goh et al., 2018)               |
| STE129 | <i>nhr-49(nr2041) I; eavEx20[Pfmo-2::<i>gfp</i> + <i>rol-6(su1006)</i>]</i> | This study                       |
| ZG31   | <i>hif-1(ia4) V</i>                                                         | (Jiang et al., 2001)             |
| STE130 | <i>nhr-49(nr2041) I; hif-1(ia4) V</i>                                       | This study                       |
| VC1668 | <i>fmo-2(ok2147) IV</i>                                                     | (Leiser et al., 2015)            |
| RB1899 | <i>acs-2(ok2457) V</i>                                                      | (J. Zhang et al., 2011)          |
| STE131 | <i>fmo-2(ok2147) IV; acs-2(ok2457) V</i>                                    | This study                       |
| STE110 | <i>nhr-49Iet13) I</i>                                                       | (K. Lee et al., 2016)            |

|        |                                                                          |                          |
|--------|--------------------------------------------------------------------------|--------------------------|
| AGP33a | <i>nhr-49(nr2041)I; glmEx5 [Pnhr-49::nhr-49::gfp + Pmyo-2::mCherry]</i>  | (Naim et al., 2020)      |
| AGP65  | <i>nhr-49(nr2041)I; glmEx9 [Pgly-19::nhr-49::gfp + Pmyo-2::mCherry]</i>  | (Naim et al., 2020)      |
| AGP53  | <i>nhr-49(nr2041)I; glmEx11 [Pcol-12::nhr-49::gfp + Pmyo-2::mCherry]</i> | (Naim et al., 2020)      |
| AGP51  | <i>nhr-49(nr2041)I; glmEx13 [Prgef-1::nhr-49::gfp + Pmyo-2::mCherry]</i> | (Naim et al., 2020)      |
| WBM170 | <i>wbmEx57 [Pacs-2::gfp + rol-6(su1006)]</i>                             | (Burkewitz et al., 2015) |
| WBM169 | <i>nhr-49(nr2041) I; wbmEx57 [Pacs-2::gfp + rol-6(su1006)]</i>           | (Burkewitz et al., 2015) |
| AGP25f | <i>glmEx5 (Pnhr-49::nhr-49::gfp + Pmyo-2::mCherry)</i>                   | (Ratnappan et al., 2014) |
| EK273  | <i>hpk-1(pk1393) X</i>                                                   | (Raich et al., 2003)     |
| STE132 | <i>nhr-49(nr2041) I; hpk-1(pk1393) X</i>                                 | This study               |
| STE133 | <i>hif-1(ia4) V; hpk-1(pk1393) X</i>                                     | This study               |
| STE117 | <i>nhr-49(et13) I; eavEx20[Pfmo-2::gfp + rol-6(su1006)]</i>              | (Goh et al., 2018)       |
| AVS394 | <i>artEx12 [Phpk-1::gfp + rol-6(su1006)]</i>                             | (Das et al., 2017)       |

1143

1144 **Supplementary Table 7.** List of qRT-PCR primer sequences used in this study.

| Gene          | Forward primer (5'-3') | Reverse Primer (5'-3') |
|---------------|------------------------|------------------------|
| <i>fmo-2</i>  | GGAACAAGCGTGTGCTGT     | GCCATAGAGAAGACCATGTCTG |
| <i>acs-2</i>  | AGTGAGACTTGACAGTTCCG   | CTTGTAAGAGAGGAATGGCTC  |
| <i>nhr-49</i> | TCCGAGTTCATTCTCGACG    | GGATGAATTGCCAATGGAGC   |
| <i>hpk-1</i>  | TGTCAAAGTGAAGCCGCTGG   | CGGCGCCAGTTCGTGTAGTA   |
| <i>nhr-67</i> | GAGGATGATGCGACGAGTAG   | TGGTCTTGAAGAGGAAGGGGA  |

|              |                              |                            |
|--------------|------------------------------|----------------------------|
| <i>act-1</i> | GCTGGACGTGATCTTACTGATTACC    | GTAGCAGAGCTTCTCCTTGATGTC   |
| <i>tba-1</i> | GTACACTCCACTGATCTCTGCTGACAAG | CTCTGTACAAGAGGCAAACAGCCATG |
| <i>ubc-2</i> | AGGGAGGTGTCTTCTTCCTCAC       | CGGA TTTGGA TCACAGAGCAGC   |

1145
